# Supplementary material for: Tryptophan Metabolism by Gut Microbiome and Gut-Brain-Axis: An in silico Analysis
Source: Front Neurosci. 2019 Dec 18;13:1365. doi: 10.3389/fnins.2019.01365 (PMC6930238; doi:10.3389/fnins.2019.01365)
Supplement: Supplementary file 1 [file Table_1.XLSX]

## Sheet: Sheet1
Supplementary Table S1: Details on the enzymes involved in each of the six tryptophan metabolism pathways.
Pathways	Gene Name	EC number	Pfam ID	Pfam Domain
Tryptophan -> Kynurenine	KynA	1.13.11.11	PF03301	Trp_dioxygenase
	KynB	3.5.1.9	PF04199	Cyclase
Tryptophan -> Quinolinate	KynA	1.13.11.11	PF03301	Trp_dioxygenase
	KynB	3.5.1.9	PF04199	Cyclase
	kmo	1.14.13.9	PF01494	FAD_binding_3
	KynU	3.7.1.3	PF00266	Aminotran_5
	HAAO	1.13.11.6	PF06052	3-HAO
i) Tryptophan -> Indole acetic acid (IAA)	ipdC	4.1.1.74	PF02775	TPP_enzyme_C
			PF00205	TPP_enzyme_M
			PF02776	TPP_enzyme_N
	aldh	1.2.1.3	PF00171	Aldedh
	AAO1	1.2.3.7	PF01315	Ald_Xan_dh_C
			PF02738	Ald_Xan_dh_C2
ii) Tryptophan -> Indole acetic acid (IAA)	iaaM	1.13.12.3	PF01593	Amino_oxidase
Tryptophan -> Indole propionic acid (IPA)	fldL	NA	PF00501	AMP-binding
			PF13193	AMP-binding_C
	fldA	2.8.3.17	PF02515	CoA_tranf_3
	fldI	3.6.1.-	PF01869	BcrAD_BadFG
	fldB	4.2.1.-	PF06050	HGD-D
	fldC	4.2.1.-	PF06050	HGD-D
Tryptophan -> Indole	TnaA	4.1.99.1	PF01212	Beta_elim_lyase
Tryptophan -> Tryptamine	ddc	4.1.1.28	PF00282	Pyridoxal_deC
