# Supplementary material for: Tryptophan Metabolism by Gut Microbiome and Gut-Brain-Axis: An in silico Analysis
Source: Front Neurosci. 2019 Dec 18;13:1365. doi: 10.3389/fnins.2019.01365 (PMC6930238; doi:10.3389/fnins.2019.01365)
Supplement: Supplementary file 3 [file Table_3.xlsx]

## Sheet: Sheet1
Supplementary Table S3: Binary profile of six tryptophan metabolism pathways across completely sequenced bacterial genomes (obtained from NCBI and HMP). ‘1’ and ‘0’ indicate presence and absence of the six pathways respectively. IAA_1 and IAA_2 represent the pathways utilizing tryptophan 2-monooxgenase and indolepyruvate decarboxylase respectively.
Bacterial Strains	Tryptophan metabolism pathways
	Kynurenine	Quinolinate	IAA_1	IAA_2	IPA	Indole	Tryptamine
Acetobacter_pasteurianus_386B_strain=386B	0	0	0	1	0	0	1
Acetobacter_pasteurianus_IFO_3283-01-42C_strain=IFO_3283_substr._IFO_3283-01-42C	0	0	0	1	0	0	1
Acetobacter_pasteurianus_IFO_3283-01_strain=IFO_3283_substr._IFO_3283-01	0	0	0	1	0	0	1
Acetobacter_pasteurianus_IFO_3283-03_strain=IFO_3283_substr._IFO_3283-03	0	0	0	1	0	0	1
Acetobacter_pasteurianus_IFO_3283-07_strain=IFO_3283_substr._IFO_3283-07	0	0	0	1	0	0	1
Acetobacter_pasteurianus_IFO_3283-12_strain=IFO_3283_substr._IFO_3283-12	0	0	0	1	0	0	1
Acetobacter_pasteurianus_IFO_3283-22_strain=IFO_3283_substr._IFO_3283-22	0	0	0	1	0	0	1
Acetobacter_pasteurianus_IFO_3283-26_strain=IFO_3283_substr._IFO_3283-26	0	0	0	1	0	0	1
Acetobacter_pasteurianus_IFO_3283-32_strain=IFO_3283_substr._IFO_3283-32	0	0	0	1	0	0	1
Acetobacter_pasteurianus_NBRC_101655_strain=NBRC_101655	0	0	0	1	0	0	1
Acetobacter_pasteurianus_strain=Ab3	0	0	0	1	0	0	1
Acetobacter_pasteurianus_strain=dm	0	0	0	1	0	0	1
Acetobacter_pasteurianus_subsp._ascendens_strain=LMG_1590	0	0	0	1	0	0	1
Acetobacter_pasteurianus_subsp._ascendens_strain=SRCM101447	0	0	0	1	0	0	1
Acetobacter_pasteurianus_subsp._paradoxus_strain=LMG_1591	0	0	0	1	0	0	1
Acetobacter_pasteurianus_subsp._pasteurianus_strain=SRCM101342	0	0	0	1	0	0	1
Acetobacter_pasteurianus_subsp._pasteurianus_strain=SRCM101468	0	0	0	1	0	0	1
Achromobacter_denitrificans_strain=PR1	1	1	0	0	0	0	0
Achromobacter_denitrificans_strain=USDA-ARS-USMARC-56712	1	1	0	0	0	0	0
Achromobacter_insolitus_strain=DSM_23807	1	1	0	0	0	0	0
Achromobacter_xylosoxidans_C54_strain=C54	1	1	0	0	0	0	0
Achromobacter_xylosoxidans_NBRC_15126_=_ATCC_27061_strain=NBRC_15126_=_ATCC_27061	1	1	0	0	0	0	0
Achromobacter_xylosoxidans_strain=FDAARGOS_147	1	1	0	0	0	0	0
Achromobacter_xylosoxidans_strain=FDAARGOS_150	1	0	0	0	0	0	0
Achromobacter_xylosoxidans_strain=FDAARGOS_162	1	0	0	0	0	0	0
Achromobacter_xylosoxidans_strain=MN001	1	1	0	0	0	0	0
Achromobacter_xylosoxidans_strain=NCTC10807	1	1	0	0	0	0	0
Acidovorax_avenae_subsp._avenae_ATCC_19860_strain=ATCC_19860	1	0	0	0	0	0	0
Acidovorax_citrulli_AAC00-1_strain=AAC00-1	1	0	0	0	0	0	0
Acidovorax_ebreus_TPSY_strain=TPSY	1	0	0	0	0	0	0
Acidovorax_sp._KKS102_strain=KKS102	1	0	0	0	0	0	0
Acidovorax_sp._NA2_strain=NA2	1	0	0	0	0	0	0
Acidovorax_sp._NA3_strain=NA3	1	0	0	0	0	0	0
Acidovorax_sp._P3_strain=P3	1	0	0	0	0	0	0
Acidovorax_sp._P4_strain=P4	1	0	0	0	0	0	0
Acidovorax_sp._RAC01_strain=RAC01	1	0	0	0	0	0	0
Acinetobacter_baumannii_AYE_strain=AYE	0	0	0	1	0	0	0
Acinetobacter_baumannii_strain=15A34	0	0	0	1	0	0	0
Acinetobacter_radioresistens_SH164	0	0	0	1	0	0	0
Actinoalloteichus_hoggarensis_strain=DSM_45943	1	0	0	0	0	0	0
Actinoalloteichus_hymeniacidonis_strain=HPA177T_=DSM_45092T	1	0	0	0	0	0	0
Actinoalloteichus_sp._ADI127-7_strain=ADI127-7	1	0	0	0	0	0	0
Actinoalloteichus_sp._GBA129-24_strain=GBA129-24	1	0	0	0	0	0	0
Actinoplanes_friuliensis_DSM_7358_strain=DSM_7358	1	0	0	0	0	0	0
Actinoplanes_missouriensis_431_strain=431	1	0	0	0	0	0	0
Actinoplanes_sp._N902-109_strain=N902-109	1	0	0	0	0	0	0
Actinoplanes_sp._SE50_110_ACP50	1	0	0	0	0	0	0
Actinoplanes_sp._SE50_110_strain=SE50_110	1	0	0	0	0	0	0
Actinopolyspora_erythraea_strain=YIM_90600	1	0	0	0	0	0	0
Actinosynnema_mirum_DSM_43827_strain=DSM_43827	1	0	0	0	0	0	1
Advenella_kashmirensis_WT001_strain=WT001	1	0	0	0	0	0	0
Advenella_mimigardefordensis_DPN7_strain=DPN7	1	0	0	0	0	0	0
Aequorivita_sublithincola_DSM_14238_strain=DSM_14238	1	1	0	0	0	0	0
Aeromicrobium_erythreum_strain=AR18	1	0	0	0	0	0	0
Aeromonas_hydrophila_4AK4_strain=4AK4	0	0	0	0	0	1	0
Aeromonas_hydrophila_AL09-71_strain=AL09-71_4	0	0	0	0	0	1	0
Aeromonas_hydrophila_J-1_strain=J-1	0	0	0	0	0	1	0
Aeromonas_hydrophila_ML09-119_strain=ML09-119	0	0	0	0	0	1	0
Aeromonas_hydrophila_NJ-35_strain=NJ-35	0	0	0	0	0	1	0
Aeromonas_hydrophila_pc104A_strain=pc104A	0	0	0	0	0	1	0
Aeromonas_hydrophila_strain=AH10	0	0	0	0	0	1	0
Aeromonas_hydrophila_strain=AHNIH1	0	0	0	0	0	1	0
Aeromonas_hydrophila_strain=AL06-06	0	0	0	0	0	1	0
Aeromonas_hydrophila_strain=D4	0	0	0	0	0	1	0
Aeromonas_hydrophila_strain=GYK1	0	0	0	0	0	1	0
Aeromonas_hydrophila_strain=JBN2301	0	0	0	0	0	1	0
Aeromonas_hydrophila_subsp._hydrophila_ATCC_7966_strain=ATCC_7966	0	0	0	0	0	1	0
Aeromonas_hydrophila_YL17_strain=YL17	0	0	0	0	0	1	0
Aeromonas_media_WS_strain=WS	0	0	0	0	0	1	0
Aeromonas_salmonicida_subsp._salmonicida_A449_strain=A449	0	0	0	0	0	1	0
Aeromonas_sp._O23A_strain=O23A	0	0	0	0	0	1	0
Aggregatibacter_aphrophilus_NJ8700_strain=NJ8700	0	1	0	0	0	0	0
Agrobacterium_fabrum_str._C58_strain=C58	0	0	1	0	0	0	0
Agrobacterium_radiobacter_K84_strain=K84_ATCC_BAA-868	0	1	0	0	0	0	0
Agrobacterium_sp._H13-3_strain=H13-3	0	1	0	0	0	0	0
Agrobacterium_tumefaciens_strain=Ach5	0	1	1	0	0	0	0
Agrobacterium_tumefaciens_strain=S33	0	0	1	0	0	0	0
Agrobacterium_vitis_S4_strain=S4_Kecskemet-Hungary;_ATCC_BAA-846	0	0	1	0	0	0	0
Agromyces_aureus_strain=AR33	1	1	0	0	0	0	0
Akkermansia_muciniphila_ATCC_BAA-835_strain=ATCC_BAA-835	0	0	0	0	0	1	0
Alcaligenes_faecalis_strain=JQ135	1	0	0	0	0	0	0
Alcaligenes_faecalis_strain=P156	1	0	0	0	0	0	0
Alcaligenes_faecalis_strain=ZD02	1	0	0	0	0	0	0
Algibacter_alginicilyticus_strain=HZ22	1	1	0	0	0	0	0
Algoriphagus_sp._M8-2_strain=M8-2	0	1	0	0	0	0	0
Alicycliphilus_denitrificans_BC_strain=BC	0	0	0	0	0	1	0
Alicycliphilus_denitrificans_K601_strain=K601	0	0	0	0	0	1	0
Alistipes_indistinctus_YIT_12060	0	0	0	0	0	1	0
Alistipes_putredinis_DSM_17216	0	0	0	0	0	1	0
Alistipes_shahii_WAL_8301	0	0	0	0	0	1	0
Alkaliphilus_metalliredigens_QYMF_strain=QYMF	0	0	0	0	0	1	0
Alkalitalea_saponilacus_strain=SC_BZ-SP2	0	1	0	0	0	0	0
Alloactinosynnema_sp._L-07_strain=L-07_Alloactinosynnema_sp._L-07	1	0	0	0	0	0	0
Altererythrobacter_dongtanensis_strain=KCTC_22672	1	0	0	0	0	0	0
Altererythrobacter_epoxidivorans_strain=CGMCC_1.7731	1	0	0	0	0	0	0
Altererythrobacter_marensis_strain=KCTC_22370	1	0	0	0	0	0	0
Alteromonas_addita_strain=R10SW13	1	0	0	0	0	0	0
Aminobacter_aminovorans_strain=KCTC_2477	1	1	0	0	0	0	0
Amycolatopsis_japonica_strain=MG417-CF17	1	0	0	0	0	0	0
Amycolatopsis_lurida_NRRL_2430_strain=NRRL_2430	1	1	0	0	0	0	0
Amycolatopsis_mediterranei_RB_strain=RB	1	0	0	0	0	0	0
Amycolatopsis_mediterranei_S699_strain=S699	1	0	0	0	0	0	0
Amycolatopsis_mediterranei_U32_strain=U32	1	0	0	0	0	0	0
Amycolatopsis_methanolica_239_strain=239	1	0	0	0	0	0	0
Amycolatopsis_orientalis_HCCB10007_strain=HCCB10007	1	0	0	0	0	0	0
Amycolatopsis_orientalis_strain=B-37	1	0	0	0	0	0	0
Anabaena_variabilis_ATCC_29413_strain=ATCC_29413	0	0	0	1	0	0	0
Anaerococcus_hydrogenalis_DSM_7454	0	0	0	0	0	1	0
Anaeromyxobacter_sp._Fw109-5_strain=Fw109-5	0	0	0	0	0	1	1
Anaerotruncus_colihominis_DSM_17241	0	0	0	0	0	1	0
Aneurinibacillus_sp._XH2_strain=Xh2	1	1	0	0	0	0	0
Anoxybacillus_amylolyticus_strain=DSM_15939	1	0	0	0	0	0	0
Anoxybacillus_sp._B2M1_strain=b2m1	1	0	0	0	0	0	0
Anoxybacillus_sp._B7M1_strain=b7m1	1	0	0	0	0	0	0
Archangium_gephyra_strain=DSM_2261	1	1	0	0	0	0	0
Arenibacter_algicola_strain=SMS7	1	1	0	0	0	0	0
Aromatoleum_aromaticum_EbN1_strain=EbN1	0	0	0	0	0	1	0
Arthrobacter_alpinus_strain=R3.8	1	0	0	0	0	0	0
Arthrobacter_sp._A3_strain=A3	1	0	0	0	0	0	0
Arthrobacter_sp._ATCC_21022_strain=ATCC_21022	1	1	0	0	0	0	0
Arthrobacter_sp._ERGS1:01_strain=ERGS1:01	1	0	0	0	0	0	0
Arthrobacter_sp._FB24_strain=FB24	1	0	0	0	0	0	0
Arthrobacter_sp._Hiyo8_strain=Hiyo8	1	0	0	0	0	0	0
Arthrobacter_sp._LS16_strain=LS16	1	0	0	0	0	0	0
Arthrobacter_sp._QXT-31_strain=QXT-31	1	0	0	0	0	0	0
Arthrobacter_sp._Rue61a_strain=Rue61a	1	0	1	0	0	0	0
Arthrobacter_sp._YN_strain=YN	1	0	0	0	0	0	0
Arthrobacter_sp._ZXY-2_strain=ZXY-2	1	0	0	0	0	0	0
Azoarcus_sp._BH72_strain=BH72	0	0	0	0	0	1	0
Azoarcus_sp._CIB_strain=CIB	0	0	0	1	0	1	0
Azoarcus_sp._KH32C_strain=KH32C	0	0	0	0	0	1	0
Azospirillum_sp._B510_strain=B510	1	0	0	0	0	0	0
Bacillus_amyloliquefaciens_CC178_strain=CC178	0	1	0	0	0	0	0
Bacillus_amyloliquefaciens_DSM_7_strain=DSM_7	0	1	0	0	0	0	0
Bacillus_amyloliquefaciens_IT-45_strain=IT-45	0	1	0	0	0	0	0
Bacillus_amyloliquefaciens_KHG19_strain=KHG19	0	1	0	0	0	0	0
Bacillus_amyloliquefaciens_LFB112_strain=LFB112	0	1	0	0	0	0	0
Bacillus_amyloliquefaciens_LL3_strain=LL3	0	1	0	0	0	0	0
Bacillus_amyloliquefaciens_strain=B15	0	1	0	0	0	0	0
Bacillus_amyloliquefaciens_strain=L-H15	0	1	0	0	0	0	0
Bacillus_amyloliquefaciens_strain=LM2303	0	1	0	0	0	0	0
Bacillus_amyloliquefaciens_strain=L-S60	0	1	0	0	0	0	0
Bacillus_amyloliquefaciens_strain=MBE1283	0	1	0	0	0	0	0
Bacillus_amyloliquefaciens_strain=MT45	0	1	0	0	0	0	0
Bacillus_amyloliquefaciens_strain=RD7-7	0	1	0	0	0	0	0
Bacillus_amyloliquefaciens_strain=S499	0	1	0	0	0	0	0
Bacillus_amyloliquefaciens_strain=SRCM101267	0	1	0	0	0	0	0
Bacillus_amyloliquefaciens_strain=WS-8	0	1	0	0	0	0	0
Bacillus_amyloliquefaciens_strain=Y14	0	1	0	0	0	0	0
Bacillus_amyloliquefaciens_TA208_strain=TA208	0	1	0	0	0	0	0
Bacillus_amyloliquefaciens_UMAF6614_strain=UMAF6614	0	1	0	0	0	0	0
Bacillus_amyloliquefaciens_UMAF6639_strain=UMAF6639	0	1	0	0	0	0	0
Bacillus_amyloliquefaciens_XH7_strain=XH7	0	1	0	0	0	0	0
Bacillus_anthracis_str._A0248_strain=A0248	1	0	0	0	0	0	0
Bacillus_anthracis_str._A16R_strain=A16R	1	0	0	0	0	0	0
Bacillus_anthracis_str._A16_strain=A16	1	0	0	0	0	0	0
Bacillus_anthracis_strain=2000031021	1	0	0	0	0	0	0
Bacillus_anthracis_strain=2002013094	1	0	0	0	0	0	0
Bacillus_anthracis_strain=A1144	1	0	0	0	0	0	0
Bacillus_anthracis_strain=Ames	1	0	0	0	0	0	0
Bacillus_anthracis_strain=Ames_A0462	1	0	0	0	0	0	0
Bacillus_anthracis_strain=BA1015	1	0	0	0	0	0	0
Bacillus_anthracis_strain=BA1035	1	0	0	0	0	0	0
Bacillus_anthracis_strain=Canadian_bison	1	0	0	0	0	0	0
Bacillus_anthracis_strain=Cvac02_blood	1	0	0	0	0	0	0
Bacillus_anthracis_strain=FDAARGOS_341	1	0	0	0	0	0	0
Bacillus_anthracis_strain=Han_Blood	1	0	0	0	0	0	0
Bacillus_anthracis_strain=HYU01	1	0	0	0	0	0	0
Bacillus_anthracis_strain=K3	1	0	0	0	0	0	0
Bacillus_anthracis_strain=Ohio_ACB	1	0	0	0	0	0	0
Bacillus_anthracis_strain=PAK-1	1	0	0	0	0	0	0
Bacillus_anthracis_strain=Parent1	1	0	0	0	0	0	0
Bacillus_anthracis_strain=Parent2	1	0	0	0	0	0	0
Bacillus_anthracis_strain=Pasteur	1	0	0	0	0	0	0
Bacillus_anthracis_strain=PR01	1	0	0	0	0	0	0
Bacillus_anthracis_strain=PR02	1	0	0	0	0	0	0
Bacillus_anthracis_strain=PR05	1	0	0	0	0	0	0
Bacillus_anthracis_strain=PR06	1	0	0	0	0	0	0
Bacillus_anthracis_strain=PR07	1	0	0	0	0	0	0
Bacillus_anthracis_strain=PR08	1	0	0	0	0	0	0
Bacillus_anthracis_strain=PR09-1	1	0	0	0	0	0	0
Bacillus_anthracis_strain=PR09-4	1	0	0	0	0	0	0
Bacillus_anthracis_strain=PR10-4	1	0	0	0	0	0	0
Bacillus_anthracis_strain=RA3	1	0	0	0	0	0	0
Bacillus_anthracis_strain=SK-102	1	0	0	0	0	0	0
Bacillus_anthracis_strain=SPV842_15	1	0	0	0	0	0	0
Bacillus_anthracis_strain=Stendal	1	0	0	0	0	0	0
Bacillus_anthracis_strain=Tangail-1	1	0	0	0	0	0	0
Bacillus_anthracis_strain=Tyrol_4675	1	0	0	0	0	0	0
Bacillus_anthracis_strain=Vollum_1B	1	0	0	0	0	0	0
Bacillus_anthracis_str._'Ames_Ancestor'_strain=Ames_Ancestor;_A2084	1	0	0	0	0	0	0
Bacillus_anthracis_str._Ames_strain=Ames	1	0	0	0	0	0	0
Bacillus_anthracis_str._CDC_684_strain=CDC_684	1	0	0	0	0	0	0
Bacillus_anthracis_str._H9401_strain=H9401	1	0	0	0	0	0	0
Bacillus_anthracis_str._Sterne_strain=Sterne	1	0	0	0	0	0	0
Bacillus_anthracis_str._SVA11_strain=SVA11	1	0	0	0	0	0	0
Bacillus_anthracis_str._Turkey32_strain=Turkey32	1	0	0	0	0	0	0
Bacillus_anthracis_str._V770-NP-1R_strain=V770-NP-1R	1	0	0	0	0	0	0
Bacillus_anthracis_str._Vollum_strain=Vollum	1	0	0	0	0	0	0
Bacillus_bombysepticus_str._Wang	1	0	0	0	0	0	0
Bacillus_cereus_03BB102_strain=03BB102	1	1	0	0	0	0	0
Bacillus_cereus_03BB108_strain=03BB108	1	1	0	0	0	0	0
Bacillus_cereus_AH187_strain=AH187	1	0	0	0	0	0	0
Bacillus_cereus_AH820_strain=AH820	1	0	0	0	0	0	0
Bacillus_cereus_ATCC_10987_strain=ATCC_10987	1	1	0	1	0	0	0
Bacillus_cereus_ATCC_14579_strain=ATCC_14579	1	0	0	1	0	0	0
Bacillus_cereus_ATCC_4342_strain=ATCC_4342	1	1	0	1	0	0	0
Bacillus_cereus_B4264_strain=B4264	1	0	0	0	0	0	0
Bacillus_cereus_biovar_anthracis_str._CI_strain=CI	1	0	0	0	0	0	0
Bacillus_cereus_D17_strain=D17	1	1	0	0	0	0	0
Bacillus_cereus_E33L_strain=E33L	1	0	0	1	0	0	0
Bacillus_cereus_F837_76_strain=F837_76	1	1	0	0	0	0	0
Bacillus_cereus_FRI-35_strain=FRI-35	1	1	0	0	0	0	0
Bacillus_cereus_G9241_strain=G9241	1	0	0	0	0	0	0
Bacillus_cereus_G9842_strain=G9842	1	0	0	0	0	0	0
Bacillus_cereus_NC7401_strain=NC7401	1	0	0	0	0	0	0
Bacillus_cereus_Q1_strain=Q1	1	0	0	0	0	0	0
Bacillus_cereus_strain=03BB87	1	0	0	0	0	0	0
Bacillus_cereus_strain=3a	1	0	0	0	0	0	0
Bacillus_cereus_strain=A1	1	0	0	0	0	0	0
Bacillus_cereus_strain=CMCC_P0011	1	0	0	0	0	0	0
Bacillus_cereus_strain=CMCC_P0021	1	0	0	0	0	0	0
Bacillus_cereus_strain=D12_2	1	0	0	0	0	0	0
Bacillus_cereus_strain=FM1	1	0	0	0	0	0	0
Bacillus_cereus_strain=FORC_005	1	0	0	0	0	0	0
Bacillus_cereus_strain=FORC_013	1	0	0	0	0	0	0
Bacillus_cereus_strain=FORC021	1	0	0	0	0	0	0
Bacillus_cereus_strain=FORC_024	1	0	0	0	0	0	0
Bacillus_cereus_strain=FORC_047	1	0	0	0	0	0	0
Bacillus_cereus_strain=FORC_048	1	0	0	0	0	0	0
Bacillus_cereus_strain=FT9	1	1	0	0	0	0	0
Bacillus_cereus_strain=HN001	1	0	0	0	0	0	0
Bacillus_cereus_strain=K8	1	0	0	0	0	0	0
Bacillus_cereus_strain=M3	1	0	0	0	0	0	0
Bacillus_cereus_strain=NJ-W	1	0	0	0	0	0	0
Bacillus_cereus_strain=S2-8	1	0	0	0	0	0	0
Bacillus_clausii_KSM-K16_strain=KSM-K16	1	0	0	0	0	0	0
Bacillus_clausii_strain=DSM_8716	1	0	0	0	0	0	0
Bacillus_clausii_strain=ENTPro	1	0	0	0	0	0	0
Bacillus_cohnii_strain=DSM_6307	1	0	0	0	0	0	0
Bacillus_cytotoxicus_NVH_391-98_strain=NVH_391-98	1	0	0	0	0	0	0
Bacillus_endophyticus_strain=Hbe603	1	0	0	0	0	0	0
Bacillus_horikoshii_strain=20a	1	1	0	0	0	0	0
Bacillus_infantis_NRRL_B-14911_strain=NRRL_B-14911	1	0	0	0	0	0	0
Bacillus_kochii_strain=BDGP4	1	1	0	0	0	0	0
Bacillus_krulwichiae_strain=AM31D	1	0	0	0	0	0	0
Bacillus_lehensis_G1_strain=G1	1	0	0	0	0	0	0
Bacillus_megaterium_DSM_319_strain=DSM_319	1	1	0	0	0	0	0
Bacillus_megaterium_NBRC_15308_=_ATCC_14581_strain=ATCC_14581	1	1	0	1	0	0	0
Bacillus_megaterium_QM_B1551_strain=QM_B1551	1	1	0	0	0	0	0
Bacillus_megaterium_strain=JX285	1	1	0	0	0	0	0
Bacillus_muralis_strain=G25-68	1	0	0	0	0	0	0
Bacillus_mycoides_strain=219298	1	1	0	0	0	0	0
Bacillus_mycoides_strain=ATCC_6462	1	0	0	0	0	0	0
Bacillus_mycoides_strain=Gnyt1	1	0	0	0	0	0	0
Bacillus_oceanisediminis_2691_strain=2691	1	0	0	0	0	0	0
Bacillus_pseudofirmus_OF4_strain=OF4	1	0	0	0	0	0	0
Bacillus_pumilus_strain=GLB197	0	1	0	0	0	0	0
Bacillus_pumilus_strain=GR-8	0	1	0	0	0	0	0
Bacillus_pumilus_strain=MTCC_B6033	0	1	0	0	0	0	0
Bacillus_pumilus_strain=NCTC10337	0	1	0	0	0	0	0
Bacillus_pumilus_strain=NJ-M2	0	1	0	0	0	0	0
Bacillus_pumilus_strain=NJ-V	0	1	0	0	0	0	0
Bacillus_pumilus_strain=NJ-V2	0	1	0	0	0	0	0
Bacillus_pumilus_strain=PDSLzg-1	0	1	0	0	0	0	0
Bacillus_pumilus_strain=SH-B11	0	1	0	0	0	0	0
Bacillus_pumilus_strain=TUAT1	0	1	0	0	0	0	0
Bacillus_pumilus_strain=W3	0	1	0	0	0	0	0
Bacillus_simplex_NBRC_15720_=_DSM_1321_strain=DSM_1321	1	1	0	0	0	0	0
Bacillus_simplex_strain=SH-B26	1	1	0	0	0	0	0
Bacillus_sp._275_strain=275	0	1	0	0	0	0	0
Bacillus_sp._7_6_55CFAA_CT2	1	0	1	1	0	0	0
Bacillus_sp._ABP14_strain=ABP14	1	0	0	0	0	0	0
Bacillus_sp._BH072_strain=BH072	0	1	0	0	0	0	0
Bacillus_sp._FDAARGOS_235_strain=FDAARGOS_235	1	0	0	0	0	0	0
Bacillus_sp._IHB_B_7164_strain=IHB_B_7164	1	1	0	0	0	0	0
Bacillus_sp._Pc3_strain=Pc3	0	1	0	0	0	0	0
Bacillus_sp._SDLI1_strain=SDLI1	0	1	0	0	0	0	0
Bacillus_sp._WP8_strain=WP8	0	1	0	0	0	0	0
Bacillus_sp._X12014_strain=X1	1	1	0	0	0	0	0
Bacillus_subtilis_strain=ATCC_13952	0	1	0	0	0	0	0
Bacillus_subtilis_strain=Bs-916	0	1	0	0	0	0	0
Bacillus_subtilis_strain=CW14	0	1	0	0	0	0	0
Bacillus_subtilis_strain=J-5	0	1	0	0	0	0	0
Bacillus_thuringiensis_BMB171_strain=BMB171	1	0	1	0	0	0	0
Bacillus_thuringiensis_Bt18247_strain=Bt18247	1	0	1	0	0	0	0
Bacillus_thuringiensis_Bt407	1	0	1	0	0	0	0
Bacillus_thuringiensis_HD1002_strain=HD1002	1	1	1	0	0	0	0
Bacillus_thuringiensis_HD-771_strain=HD-771	1	0	1	0	0	0	0
Bacillus_thuringiensis_HD-789_strain=HD-789	1	0	1	0	0	0	0
Bacillus_thuringiensis_MC28_strain=MC28	1	0	1	0	0	0	0
Bacillus_thuringiensis_serovar_alesti_strain=BGSC_4C1	1	1	1	1	0	0	1
Bacillus_thuringiensis_serovar_chinensis_CT-43_strain=CT-43	1	0	1	1	0	0	1
Bacillus_thuringiensis_serovar_coreanensis_strain=ST7	1	0	1	1	0	0	1
Bacillus_thuringiensis_serovar_finitimus_YBT-020_strain=YBT-020	1	0	1	1	0	0	1
Bacillus_thuringiensis_serovar_galleriae_strain=HD-29	1	0	1	1	0	0	1
Bacillus_thuringiensis_serovar_indiana_strain=HD521	1	0	1	1	0	0	1
Bacillus_thuringiensis_serovar_konkukian_str._97-27_strain=97-27	0	0	1	1	0	0	1
Bacillus_thuringiensis_serovar_kurstaki_str._HD-1_strain=HD-1	1	0	1	1	0	0	1
Bacillus_thuringiensis_serovar_kurstaki_str._HD73_strain=HD73	1	0	1	1	0	0	1
Bacillus_thuringiensis_serovar_kurstaki_str._YBT-1520_strain=YBT-1520	1	0	1	1	0	0	1
Bacillus_thuringiensis_serovar_morrisoni_strain=BGSC_4AA1	1	1	1	1	0	0	1
Bacillus_thuringiensis_serovar_thuringiensis_str._IS5056_strain=IS5056	1	0	1	1	0	0	1
Bacillus_thuringiensis_serovar_tolworthi_strain=Pasteur_Institute_Standard_strain	1	0	1	1	0	0	1
Bacillus_thuringiensis_strain=97-27	1	0	1	1	0	0	0
Bacillus_thuringiensis_strain=ATCC_10792	1	0	1	1	0	0	1
Bacillus_thuringiensis_strain=Bc601	1	0	1	0	0	0	0
Bacillus_thuringiensis_strain=BM-BT15426	1	1	1	0	0	0	0
Bacillus_thuringiensis_strain=Bt185	1	0	1	0	0	0	0
Bacillus_thuringiensis_strain=c25	0	0	1	0	0	0	0
Bacillus_thuringiensis_strain=CTC	1	1	1	0	0	0	0
Bacillus_thuringiensis_strain=HD1011	1	0	1	0	0	0	0
Bacillus_thuringiensis_strain=HD12	1	1	1	0	0	0	0
Bacillus_thuringiensis_strain=HD571	1	1	1	0	0	0	0
Bacillus_thuringiensis_strain=HD682	1	0	1	0	0	0	0
Bacillus_thuringiensis_strain=HS18-1	1	0	1	0	0	0	0
Bacillus_thuringiensis_strain=KNU-07	1	0	1	0	0	0	0
Bacillus_thuringiensis_strain=L-7601	1	0	1	0	0	0	0
Bacillus_thuringiensis_strain=MYBT18246	1	0	1	0	0	0	0
Bacillus_thuringiensis_strain=SCG04-02	1	0	1	0	0	0	0
Bacillus_thuringiensis_strain=XL6	1	0	1	0	0	0	0
Bacillus_thuringiensis_strain=YC-10	1	0	1	0	0	0	0
Bacillus_thuringiensis_strain=YGd22-03	1	0	1	0	0	0	0
Bacillus_thuringiensis_strain=YWC2-8	0	0	1	0	0	0	0
Bacillus_thuringiensis_str._Al_Hakam_strain=Al_Hakam	1	1	1	0	0	0	0
Bacillus_thuringiensis_str._Al_Hakam_strain=BTZ	1	1	1	0	0	0	0
Bacillus_thuringiensis_YBT-1518_strain=YBT-1518	1	0	1	0	0	0	0
Bacillus_toyonensis_BCT-7112_strain=BCT-7112	1	0	0	0	0	0	0
Bacillus_vallismortis_strain=NBIF-001	0	1	0	0	0	0	0
Bacillus_velezensis_AS43.3_strain=AS43.3	0	1	0	0	0	0	0
Bacillus_velezensis_CAU_B946_strain=CAU_B946	0	1	0	0	0	0	0
Bacillus_velezensis_FZB42_strain=FZB42	0	1	0	0	0	0	0
Bacillus_velezensis_NAU-B3_strain=NAU-B3	0	1	0	0	0	0	0
Bacillus_velezensis_NJN-6_strain=NJN-6	0	1	0	0	0	0	0
Bacillus_velezensis_SQR9_strain=SQR9	0	1	0	0	0	0	0
Bacillus_velezensis_strain=157	0	1	0	0	0	0	0
Bacillus_velezensis_strain=9912D	0	1	0	0	0	0	0
Bacillus_velezensis_strain=9D-6	0	1	0	0	0	0	0
Bacillus_velezensis_strain=B25	0	1	0	0	0	0	0
Bacillus_velezensis_strain=CBMB205	0	1	0	0	0	0	0
Bacillus_velezensis_strain=CC09	0	1	0	0	0	0	0
Bacillus_velezensis_strain=D2-2_Doenjang	0	1	0	0	0	0	0
Bacillus_velezensis_strain=G341	0	1	0	0	0	0	0
Bacillus_velezensis_strain=GH1-13	0	1	0	0	0	0	0
Bacillus_velezensis_strain=GQJK49	0	1	0	0	0	0	0
Bacillus_velezensis_strain=JJ-D34	0	1	0	0	0	0	0
Bacillus_velezensis_strain=JS25R	0	1	0	0	0	0	0
Bacillus_velezensis_strain=JTYP2	0	1	0	0	0	0	0
Bacillus_velezensis_strain=LS69	0	1	0	0	0	0	0
Bacillus_velezensis_strain=M75	0	1	0	0	0	0	0
Bacillus_velezensis_strain=S3-1	0	1	0	0	0	0	0
Bacillus_velezensis_strain=SB1216	0	1	0	0	0	0	0
Bacillus_velezensis_strain=SCDB_291	0	1	0	0	0	0	0
Bacillus_velezensis_strain=SRCM100072	0	1	0	0	0	0	0
Bacillus_velezensis_strain=SRCM101413	0	1	0	0	0	0	0
Bacillus_velezensis_strain=sx01604	0	1	0	0	0	0	0
Bacillus_velezensis_strain=T20E-257	0	1	0	0	0	0	0
Bacillus_velezensis_strain=TB1501	0	1	0	0	0	0	0
Bacillus_velezensis_strain=YJ11-1-4	0	1	0	0	0	0	0
Bacillus_velezensis_TrigoCor1448_strain=TrigoCor1448	0	1	0	0	0	0	0
Bacillus_velezensis_UCMB5033_strain=UCMB-5033	0	1	0	0	0	0	0
Bacillus_velezensis_UCMB5036_strain=UCMB5036	0	1	0	0	0	0	0
Bacillus_velezensis_UCMB5113_strain=UCMB5113	0	1	0	0	0	0	0
Bacillus_velezensis_YAU_B9601-Y2_strain=YAU_B9601-Y2	0	1	0	0	0	0	0
Bacillus_weihaiensis_strain=Alg07	1	0	0	0	0	0	0
Bacillus_weihenstephanensis_KBAB4_strain=KBAB4	1	0	0	0	0	0	0
Bacillus_weihenstephanensis_strain=WSBC_10204	1	0	0	0	0	0	0
Bacteroides_cellulosilyticus_DSM_14838	0	0	0	0	0	1	0
Bacteroides_clarus_YIT_12056	0	0	0	0	0	1	0
Bacteroides_eggerthii_1_2_48FAA	0	0	0	0	0	1	0
Bacteroides_eggerthii_DSM_20697	0	0	0	0	0	1	0
Bacteroides_fluxus_YIT_12057	0	0	0	0	0	1	0
Bacteroides_fragilis_638R_strain=638R	0	0	0	0	0	1	0
Bacteroides_fragilis_strain=BE1	0	0	0	0	0	1	0
Bacteroides_fragilis_strain=BOB25	0	0	0	0	0	1	0
Bacteroides_fragilis_strain=S14	0	0	0	0	0	1	0
Bacteroides_fragilis_YCH46_strain=YCH46	0	0	0	0	0	1	0
Bacteroides_intestinalis_DSM_17393	0	0	0	0	0	1	0
Bacteroides_oleiciplenus_YIT_12058	0	0	0	0	0	1	0
Bacteroides_ovatus_3_8_47FAA	0	0	0	0	0	1	0
Bacteroides_ovatus_ATCC_8483	0	0	0	0	0	1	0
Bacteroides_ovatus_SD_CMC_3f	0	0	0	0	0	1	0
Bacteroides_ovatus_strain=ATCC_8483	0	0	0	0	0	1	0
Bacteroides_ovatus_V975_strain=V975	0	0	0	0	0	1	0
Bacteroides_salyersiae_WAL_10018_=_DSM_18765_=_JCM_12988	0	0	0	0	0	1	0
Bacteroides_sp._1_1_14	0	0	0	0	0	1	0
Bacteroides_sp._1_1_30	0	0	0	0	0	1	0
Bacteroides_sp._1_1_6	0	0	0	0	0	1	0
Bacteroides_sp._2_1_16	0	0	0	0	0	1	0
Bacteroides_sp._2_1_22	0	0	0	0	0	1	0
Bacteroides_sp._2_1_33B	0	0	0	0	0	1	0
Bacteroides_sp._2_1_56FAA	0	0	0	0	0	1	0
Bacteroides_sp._2_2_4	0	0	0	0	0	1	0
Bacteroides_sp._3_1_19	0	0	0	0	0	1	0
Bacteroides_sp._3_1_23	0	0	0	0	0	1	0
Bacteroides_sp._3_1_33FAA	0	0	0	0	0	1	0
Bacteroides_sp._3_1_40A	0	0	0	0	0	1	0
Bacteroides_sp._3_2_5	0	0	0	0	0	1	0
Bacteroides_sp._4_1_36	0	0	0	0	0	1	0
Bacteroides_sp._4_3_47FAA	0	0	0	0	0	1	0
Bacteroides_sp._9_1_42FAA	0	0	0	0	0	1	0
Bacteroides_sp._D1	0	0	0	0	0	1	0
Bacteroides_sp._D2	0	0	0	0	0	1	0
Bacteroides_sp._D20	0	0	0	0	0	1	0
Bacteroides_sp._D22	0	0	0	0	0	1	0
Bacteroides_sp._HPS0048	0	0	0	0	0	1	0
Bacteroides_stercoris_ATCC_43183	0	0	0	0	0	1	0
Bacteroides_uniformis_ATCC_8492	0	0	0	0	0	1	0
Bacteroides_xylanisolvens_SD_CC_1b	0	0	0	0	0	1	0
Bacteroides_xylanisolvens_SD_CC_2a	0	0	0	0	0	1	0
Bacteroides_xylanisolvens_XB1A	0	0	0	0	0	1	0
Bacteroidetes_bacterium_UKL13-3_UKL13-3	1	1	0	0	0	0	0
Barnesiella_viscericola_DSM_18177_strain=C46	_DSM_18177	0	0	0	0	0	0
Belliella_baltica_DSM_15883_strain=DSM_15883	0	1	0	0	0	0	0
Bernardetia_litoralis_DSM_6794_strain=DSM_6794	1	1	0	0	0	0	0
Bifidobacterium_catenulatum_DSM_16992_=_JCM_1194_=_LMG_11043	0	0	0	0	0	0	1
Bifidobacterium_catenulatum_DSM_16992_=_JCM_1194_=_LMG_11043_strain=JCM_1194	0	0	0	0	0	0	1
Blastomonas_sp._RAC04_strain=RAC04	1	0	0	0	0	0	0
Blautia_hansenii_DSM_20583	0	0	0	0	0	0	1
Bordetella_avium_197N_strain=197N	1	0	0	0	0	0	0
Bordetella_bronchiseptica_253_strain=253	1	0	0	0	0	0	0
Bordetella_bronchiseptica_MO149_strain=MO149	1	0	0	0	0	0	0
Bordetella_bronchiseptica_strain=ATCC:BAA-588D-5	1	0	0	0	0	0	0
Bordetella_bronchiseptica_strain=I328	1	0	0	0	0	0	0
Bordetella_bronchiseptica_strain=S798	1	0	0	0	0	0	0
Bordetella_genomosp._13_strain=AU7206	1	0	0	0	0	0	0
Bordetella_genomosp._6_strain=AU22978	1	0	0	0	0	0	0
Bordetella_hinzii_strain=F582	1	0	0	0	0	0	0
Bordetella_hinzii_strain=H568	1	0	0	0	0	0	0
Bordetella_hinzii_strain=NCTC13200	1	0	0	0	0	0	0
Bordetella_holmesii_44057_strain=44057	1	0	0	0	0	0	0
Bordetella_holmesii_ATCC_51541_strain=ATCC_51541	1	0	0	0	0	0	0
Bordetella_holmesii_F627_strain=F627	1	0	0	0	0	0	0
Bordetella_holmesii_H558_strain=H558	1	0	0	0	0	0	0
Bordetella_holmesii_strain=H903	1	0	0	0	0	0	0
Bordetella_parapertussis_12822_strain=12822	1	0	0	0	0	0	0
Bordetella_parapertussis_Bpp5_strain=Bpp5	1	0	0	0	0	0	0
Bordetella_parapertussis_strain=H904	1	0	0	0	0	0	0
Bordetella_pertussis_137_strain=137	1	0	0	0	0	0	0
Bordetella_pertussis_18323_strain=18323	1	0	0	0	0	0	0
Bordetella_pertussis_B1917_strain=B1917	1	0	0	0	0	0	0
Bordetella_pertussis_CS_strain=CS	1	0	0	0	0	0	0
Bordetella_pertussis_strain=ATCC:BAA-1335D-5	1	0	0	0	0	0	0
Bordetella_pertussis_strain=B1838	1	0	0	0	0	0	0
Bordetella_pertussis_strain=B1865	1	0	0	0	0	0	0
Bordetella_pertussis_strain=B201	1	0	0	0	0	0	0
Bordetella_pertussis_strain=B202	1	0	0	0	0	0	0
Bordetella_pertussis_strain=B203	1	0	0	0	0	0	0
Bordetella_pertussis_strain=B226	1	0	0	0	0	0	0
Bordetella_pertussis_strain=B227	1	0	0	0	0	0	0
Bordetella_pertussis_strain=B3405	1	0	0	0	0	0	0
Bordetella_pertussis_strain=B3582	1	0	0	0	0	0	0
Bordetella_pertussis_strain=B3585	1	0	0	0	0	0	0
Bordetella_pertussis_strain=B3621	1	0	0	0	0	0	0
Bordetella_pertussis_strain=B3629	1	0	0	0	0	0	0
Bordetella_pertussis_strain=B3640	1	0	0	0	0	0	0
Bordetella_pertussis_strain=B3913	1	0	0	0	0	0	0
Bordetella_pertussis_strain=B3921	1	0	0	0	0	0	0
Bordetella_pertussis_strain=C393	1	0	0	0	0	0	0
Bordetella_pertussis_strain=C505	1	0	0	0	0	0	0
Bordetella_pertussis_strain=C549	1	0	0	0	0	0	0
Bordetella_pertussis_strain=C571	1	0	0	0	0	0	0
Bordetella_pertussis_strain=C734	1	0	0	0	0	0	0
Bordetella_pertussis_strain=C757	1	0	0	0	0	0	0
Bordetella_pertussis_strain=C934	1	0	0	0	0	0	0
Bordetella_pertussis_strain=C975	1	0	0	0	0	0	0
Bordetella_pertussis_strain=D175	1	0	0	0	0	0	0
Bordetella_pertussis_strain=D422	1	0	0	0	0	0	0
Bordetella_pertussis_strain=D502	1	0	0	0	0	0	0
Bordetella_pertussis_strain=D521	1	0	0	0	0	0	0
Bordetella_pertussis_strain=D717	1	0	0	0	0	0	0
Bordetella_pertussis_strain=D735	1	0	0	0	0	0	0
Bordetella_pertussis_strain=D799	1	0	0	0	0	0	0
Bordetella_pertussis_strain=D879	1	0	0	0	0	0	0
Bordetella_pertussis_strain=D925	1	0	0	0	0	0	0
Bordetella_pertussis_strain=E024	1	0	0	0	0	0	0
Bordetella_pertussis_strain=E025	1	0	0	0	0	0	0
Bordetella_pertussis_strain=E150	1	0	0	0	0	0	0
Bordetella_pertussis_strain=E194	1	0	0	0	0	0	0
Bordetella_pertussis_strain=E368	1	0	0	0	0	0	0
Bordetella_pertussis_strain=E476	1	0	0	0	0	0	0
Bordetella_pertussis_strain=E530	1	0	0	0	0	0	0
Bordetella_pertussis_strain=E537	1	0	0	0	0	0	0
Bordetella_pertussis_strain=E541	1	0	0	0	0	0	0
Bordetella_pertussis_strain=E555	1	0	0	0	0	0	0
Bordetella_pertussis_strain=E587	1	0	0	0	0	0	0
Bordetella_pertussis_strain=E602	1	0	0	0	0	0	0
Bordetella_pertussis_strain=E809	1	0	0	0	0	0	0
Bordetella_pertussis_strain=E898	1	0	0	0	0	0	0
Bordetella_pertussis_strain=E945	1	0	0	0	0	0	0
Bordetella_pertussis_strain=E976	1	0	0	0	0	0	0
Bordetella_pertussis_strain=F011	1	0	0	0	0	0	0
Bordetella_pertussis_strain=F034	1	0	0	0	0	0	0
Bordetella_pertussis_strain=F501	1	0	0	0	0	0	0
Bordetella_pertussis_strain=F657	1	0	0	0	0	0	0
Bordetella_pertussis_strain=F658	1	0	0	0	0	0	0
Bordetella_pertussis_strain=F670	1	0	0	0	0	0	0
Bordetella_pertussis_strain=F687	1	0	0	0	0	0	0
Bordetella_pertussis_strain=F778	1	0	0	0	0	0	0
Bordetella_pertussis_strain=F934	1	0	0	0	0	0	0
Bordetella_pertussis_strain=F948	1	0	0	0	0	0	0
Bordetella_pertussis_strain=G057	1	0	0	0	0	0	0
Bordetella_pertussis_strain=G085	1	0	0	0	0	0	0
Bordetella_pertussis_strain=G807	1	0	0	0	0	0	0
Bordetella_pertussis_strain=G965	1	0	0	0	0	0	0
Bordetella_pertussis_strain=H321	1	0	0	0	0	0	0
Bordetella_pertussis_strain=H346	1	0	0	0	0	0	0
Bordetella_pertussis_strain=H348	1	0	0	0	0	0	0
Bordetella_pertussis_strain=H361	1	0	0	0	0	0	0
Bordetella_pertussis_strain=H374	1	0	0	0	0	0	0
Bordetella_pertussis_strain=H375	1	0	0	0	0	0	0
Bordetella_pertussis_strain=H378	1	0	0	0	0	0	0
Bordetella_pertussis_strain=H379	1	0	0	0	0	0	0
Bordetella_pertussis_strain=H380	1	0	0	0	0	0	0
Bordetella_pertussis_strain=H382	1	0	0	0	0	0	0
Bordetella_pertussis_strain=H437	1	0	0	0	0	0	0
Bordetella_pertussis_strain=H489	1	0	0	0	0	0	0
Bordetella_pertussis_strain=H520	1	0	0	0	0	0	0
Bordetella_pertussis_strain=H533	1	0	0	0	0	0	0
Bordetella_pertussis_strain=H540	1	0	0	0	0	0	0
Bordetella_pertussis_strain=H542	1	0	0	0	0	0	0
Bordetella_pertussis_strain=H559	1	0	0	0	0	0	0
Bordetella_pertussis_strain=H561	1	0	0	0	0	0	0
Bordetella_pertussis_strain=H563	1	0	0	0	0	0	0
Bordetella_pertussis_strain=H564	1	0	0	0	0	0	0
Bordetella_pertussis_strain=H579	1	0	0	0	0	0	0
Bordetella_pertussis_strain=H622	1	0	0	0	0	0	0
Bordetella_pertussis_strain=H627	1	0	0	0	0	0	0
Bordetella_pertussis_strain=H636	1	0	0	0	0	0	0
Bordetella_pertussis_strain=H637	1	0	0	0	0	0	0
Bordetella_pertussis_strain=H639	1	0	0	0	0	0	0
Bordetella_pertussis_strain=H665	1	0	0	0	0	0	0
Bordetella_pertussis_strain=H681	1	0	0	0	0	0	0
Bordetella_pertussis_strain=H682	1	0	0	0	0	0	0
Bordetella_pertussis_strain=H696	1	0	0	0	0	0	0
Bordetella_pertussis_strain=H698	1	0	0	0	0	0	0
Bordetella_pertussis_strain=H703	1	0	0	0	0	0	0
Bordetella_pertussis_strain=H706	1	0	0	0	0	0	0
Bordetella_pertussis_strain=H707	1	0	0	0	0	0	0
Bordetella_pertussis_strain=H710	1	0	0	0	0	0	0
Bordetella_pertussis_strain=H729	1	0	0	0	0	0	0
Bordetella_pertussis_strain=H730	1	0	0	0	0	0	0
Bordetella_pertussis_strain=H740	1	0	0	0	0	0	0
Bordetella_pertussis_strain=H754	1	0	0	0	0	0	0
Bordetella_pertussis_strain=H762	1	0	0	0	0	0	0
Bordetella_pertussis_strain=H763	1	0	0	0	0	0	0
Bordetella_pertussis_strain=H764	1	0	0	0	0	0	0
Bordetella_pertussis_strain=H765	1	0	0	0	0	0	0
Bordetella_pertussis_strain=H766	1	0	0	0	0	0	0
Bordetella_pertussis_strain=H768	1	0	0	0	0	0	0
Bordetella_pertussis_strain=H771	1	0	0	0	0	0	0
Bordetella_pertussis_strain=H773	1	0	0	0	0	0	0
Bordetella_pertussis_strain=H775	1	0	0	0	0	0	0
Bordetella_pertussis_strain=H779	1	0	0	0	0	0	0
Bordetella_pertussis_strain=H784	1	0	0	0	0	0	0
Bordetella_pertussis_strain=H787	1	0	0	0	0	0	0
Bordetella_pertussis_strain=H788	1	0	0	0	0	0	0
Bordetella_pertussis_strain=H800	1	0	0	0	0	0	0
Bordetella_pertussis_strain=H806	1	0	0	0	0	0	0
Bordetella_pertussis_strain=H810	1	0	0	0	0	0	0
Bordetella_pertussis_strain=H812	1	0	0	0	0	0	0
Bordetella_pertussis_strain=H834	1	0	0	0	0	0	0
Bordetella_pertussis_strain=H842	1	0	0	0	0	0	0
Bordetella_pertussis_strain=H847	1	0	0	0	0	0	0
Bordetella_pertussis_strain=H849	1	0	0	0	0	0	0
Bordetella_pertussis_strain=H851	1	0	0	0	0	0	0
Bordetella_pertussis_strain=H852	1	0	0	0	0	0	0
Bordetella_pertussis_strain=H853	1	0	0	0	0	0	0
Bordetella_pertussis_strain=H864	1	0	0	0	0	0	0
Bordetella_pertussis_strain=H866	1	0	0	0	0	0	0
Bordetella_pertussis_strain=H876	1	0	0	0	0	0	0
Bordetella_pertussis_strain=H878	1	0	0	0	0	0	0
Bordetella_pertussis_strain=H883	1	0	0	0	0	0	0
Bordetella_pertussis_strain=H884	1	0	0	0	0	0	0
Bordetella_pertussis_strain=H910	1	0	0	0	0	0	0
Bordetella_pertussis_strain=H911	1	0	0	0	0	0	0
Bordetella_pertussis_strain=H915	1	0	0	0	0	0	0
Bordetella_pertussis_strain=I069	1	0	0	0	0	0	0
Bordetella_pertussis_strain=I075	1	0	0	0	0	0	0
Bordetella_pertussis_strain=I088	1	0	0	0	0	0	0
Bordetella_pertussis_strain=I089	1	0	0	0	0	0	0
Bordetella_pertussis_strain=I093	1	0	0	0	0	0	0
Bordetella_pertussis_strain=I106	1	0	0	0	0	0	0
Bordetella_pertussis_strain=I110	1	0	0	0	0	0	0
Bordetella_pertussis_strain=I111	1	0	0	0	0	0	0
Bordetella_pertussis_strain=I112	1	0	0	0	0	0	0
Bordetella_pertussis_strain=I113	1	0	0	0	0	0	0
Bordetella_pertussis_strain=I127	1	0	0	0	0	0	0
Bordetella_pertussis_strain=I135	1	0	0	0	0	0	0
Bordetella_pertussis_strain=I136	1	0	0	0	0	0	0
Bordetella_pertussis_strain=I150	1	0	0	0	0	0	0
Bordetella_pertussis_strain=I187	1	0	0	0	0	0	0
Bordetella_pertussis_strain=I228	1	0	0	0	0	0	0
Bordetella_pertussis_strain=I238	1	0	0	0	0	0	0
Bordetella_pertussis_strain=I257	1	0	0	0	0	0	0
Bordetella_pertussis_strain=I259	1	0	0	0	0	0	0
Bordetella_pertussis_strain=I263	1	0	0	0	0	0	0
Bordetella_pertussis_strain=I270	1	0	0	0	0	0	0
Bordetella_pertussis_strain=I271	1	0	0	0	0	0	0
Bordetella_pertussis_strain=I273	1	0	0	0	0	0	0
Bordetella_pertussis_strain=I289	1	0	0	0	0	0	0
Bordetella_pertussis_strain=I315	1	0	0	0	0	0	0
Bordetella_pertussis_strain=I318	1	0	0	0	0	0	0
Bordetella_pertussis_strain=I331	1	0	0	0	0	0	0
Bordetella_pertussis_strain=I350	1	0	0	0	0	0	0
Bordetella_pertussis_strain=I351	1	0	0	0	0	0	0
Bordetella_pertussis_strain=I373	1	0	0	0	0	0	0
Bordetella_pertussis_strain=I375	1	0	0	0	0	0	0
Bordetella_pertussis_strain=I379	1	0	0	0	0	0	0
Bordetella_pertussis_strain=I380	1	0	0	0	0	0	0
Bordetella_pertussis_strain=I382	1	0	0	0	0	0	0
Bordetella_pertussis_strain=I386	1	0	0	0	0	0	0
Bordetella_pertussis_strain=I387	1	0	0	0	0	0	0
Bordetella_pertussis_strain=I452	1	0	0	0	0	0	0
Bordetella_pertussis_strain=I461	1	0	0	0	0	0	0
Bordetella_pertussis_strain=I464	1	0	0	0	0	0	0
Bordetella_pertussis_strain=I468	1	0	0	0	0	0	0
Bordetella_pertussis_strain=I469	1	0	0	0	0	0	0
Bordetella_pertussis_strain=I472	1	0	0	0	0	0	0
Bordetella_pertussis_strain=I476	1	0	0	0	0	0	0
Bordetella_pertussis_strain=I480	1	0	0	0	0	0	0
Bordetella_pertussis_strain=I483	1	0	0	0	0	0	0
Bordetella_pertussis_strain=I496	1	0	0	0	0	0	0
Bordetella_pertussis_strain=I498	1	0	0	0	0	0	0
Bordetella_pertussis_strain=I518	1	0	0	0	0	0	0
Bordetella_pertussis_strain=I521	1	0	0	0	0	0	0
Bordetella_pertussis_strain=I538	1	0	0	0	0	0	0
Bordetella_pertussis_strain=I539	1	0	0	0	0	0	0
Bordetella_pertussis_strain=I602	1	0	0	0	0	0	0
Bordetella_pertussis_strain=I646	1	0	0	0	0	0	0
Bordetella_pertussis_strain=I656	1	0	0	0	0	0	0
Bordetella_pertussis_strain=I669	1	0	0	0	0	0	0
Bordetella_pertussis_strain=I707	1	0	0	0	0	0	0
Bordetella_pertussis_strain=I728	1	0	0	0	0	0	0
Bordetella_pertussis_strain=I730	1	0	0	0	0	0	0
Bordetella_pertussis_strain=I735	1	0	0	0	0	0	0
Bordetella_pertussis_strain=I751	1	0	0	0	0	0	0
Bordetella_pertussis_strain=I752	1	0	0	0	0	0	0
Bordetella_pertussis_strain=I754	1	0	0	0	0	0	0
Bordetella_pertussis_strain=I755	1	0	0	0	0	0	0
Bordetella_pertussis_strain=I762	1	0	0	0	0	0	0
Bordetella_pertussis_strain=I763	1	0	0	0	0	0	0
Bordetella_pertussis_strain=I915	1	0	0	0	0	0	0
Bordetella_pertussis_strain=I944	1	0	0	0	0	0	0
Bordetella_pertussis_strain=I959	1	0	0	0	0	0	0
Bordetella_pertussis_strain=I965	1	0	0	0	0	0	0
Bordetella_pertussis_strain=I968	1	0	0	0	0	0	0
Bordetella_pertussis_strain=I975	1	0	0	0	0	0	0
Bordetella_pertussis_strain=I976	1	0	0	0	0	0	0
Bordetella_pertussis_strain=I977	1	0	0	0	0	0	0
Bordetella_pertussis_strain=I978	1	0	0	0	0	0	0
Bordetella_pertussis_strain=I979	1	0	0	0	0	0	0
Bordetella_pertussis_strain=I998	1	0	0	0	0	0	0
Bordetella_pertussis_strain=J010	1	0	0	0	0	0	0
Bordetella_pertussis_strain=J012	1	0	0	0	0	0	0
Bordetella_pertussis_strain=J013	1	0	0	0	0	0	0
Bordetella_pertussis_strain=J016	1	0	0	0	0	0	0
Bordetella_pertussis_strain=J018	1	0	0	0	0	0	0
Bordetella_pertussis_strain=J019	1	0	0	0	0	0	0
Bordetella_pertussis_strain=J021	1	0	0	0	0	0	0
Bordetella_pertussis_strain=J022	1	0	0	0	0	0	0
Bordetella_pertussis_strain=J023	1	0	0	0	0	0	0
Bordetella_pertussis_strain=J027	1	0	0	0	0	0	0
Bordetella_pertussis_strain=J030	1	0	0	0	0	0	0
Bordetella_pertussis_strain=J038	1	0	0	0	0	0	0
Bordetella_pertussis_strain=J039	1	0	0	0	0	0	0
Bordetella_pertussis_strain=J068	1	0	0	0	0	0	0
Bordetella_pertussis_strain=J072	1	0	0	0	0	0	0
Bordetella_pertussis_strain=J073	1	0	0	0	0	0	0
Bordetella_pertussis_strain=J076	1	0	0	0	0	0	0
Bordetella_pertussis_strain=J078	1	0	0	0	0	0	0
Bordetella_pertussis_strain=J090	1	0	0	0	0	0	0
Bordetella_pertussis_strain=J091	1	0	0	0	0	0	0
Bordetella_pertussis_strain=J093	1	0	0	0	0	0	0
Bordetella_pertussis_strain=J096	1	0	0	0	0	0	0
Bordetella_pertussis_strain=J097	1	0	0	0	0	0	0
Bordetella_pertussis_strain=J098	1	0	0	0	0	0	0
Bordetella_pertussis_strain=J099	1	0	0	0	0	0	0
Bordetella_pertussis_strain=J100	1	0	0	0	0	0	0
Bordetella_pertussis_strain=J103	1	0	0	0	0	0	0
Bordetella_pertussis_strain=J104	1	0	0	0	0	0	0
Bordetella_pertussis_strain=J105	1	0	0	0	0	0	0
Bordetella_pertussis_strain=J107	1	0	0	0	0	0	0
Bordetella_pertussis_strain=J110	1	0	0	0	0	0	0
Bordetella_pertussis_strain=J115	1	0	0	0	0	0	0
Bordetella_pertussis_strain=J120	1	0	0	0	0	0	0
Bordetella_pertussis_strain=J121	1	0	0	0	0	0	0
Bordetella_pertussis_strain=J122	1	0	0	0	0	0	0
Bordetella_pertussis_strain=J124	1	0	0	0	0	0	0
Bordetella_pertussis_strain=J149	1	0	0	0	0	0	0
Bordetella_pertussis_strain=J152	1	0	0	0	0	0	0
Bordetella_pertussis_strain=J153	1	0	0	0	0	0	0
Bordetella_pertussis_strain=J154	1	0	0	0	0	0	0
Bordetella_pertussis_strain=J155	1	0	0	0	0	0	0
Bordetella_pertussis_strain=J159	1	0	0	0	0	0	0
Bordetella_pertussis_strain=J160	1	0	0	0	0	0	0
Bordetella_pertussis_strain=J161	1	0	0	0	0	0	0
Bordetella_pertussis_strain=J162	1	0	0	0	0	0	0
Bordetella_pertussis_strain=J169	1	0	0	0	0	0	0
Bordetella_pertussis_strain=J172	1	0	0	0	0	0	0
Bordetella_pertussis_strain=J174	1	0	0	0	0	0	0
Bordetella_pertussis_strain=J175	1	0	0	0	0	0	0
Bordetella_pertussis_strain=J178	1	0	0	0	0	0	0
Bordetella_pertussis_strain=J179	1	0	0	0	0	0	0
Bordetella_pertussis_strain=J191	1	0	0	0	0	0	0
Bordetella_pertussis_strain=J192	1	0	0	0	0	0	0
Bordetella_pertussis_strain=J194	1	0	0	0	0	0	0
Bordetella_pertussis_strain=J197	1	0	0	0	0	0	0
Bordetella_pertussis_strain=J198	1	0	0	0	0	0	0
Bordetella_pertussis_strain=J201	1	0	0	0	0	0	0
Bordetella_pertussis_strain=J206	1	0	0	0	0	0	0
Bordetella_pertussis_strain=J208	1	0	0	0	0	0	0
Bordetella_pertussis_strain=J209	1	0	0	0	0	0	0
Bordetella_pertussis_strain=J210	1	0	0	0	0	0	0
Bordetella_pertussis_strain=J225	1	0	0	0	0	0	0
Bordetella_pertussis_strain=J276	1	0	0	0	0	0	0
Bordetella_pertussis_strain=J277	1	0	0	0	0	0	0
Bordetella_pertussis_strain=J296	1	0	0	0	0	0	0
Bordetella_pertussis_strain=J300	1	0	0	0	0	0	0
Bordetella_pertussis_strain=J305	1	0	0	0	0	0	0
Bordetella_pertussis_strain=J311	1	0	0	0	0	0	0
Bordetella_pertussis_strain=J445	1	0	0	0	0	0	0
Bordetella_pertussis_strain=J446	1	0	0	0	0	0	0
Bordetella_pertussis_strain=J447	1	0	0	0	0	0	0
Bordetella_pertussis_strain=J448	1	0	0	0	0	0	0
Bordetella_pertussis_strain=J625	1	0	0	0	0	0	0
Bordetella_pertussis_strain=Pelita_III	1	0	0	0	0	0	0
Bordetella_pertussis_strain=VA-010	1	0	0	0	0	0	0
Bordetella_pertussis_strain=VA-09	1	0	0	0	0	0	0
Bordetella_pertussis_strain=VA-145	1	0	0	0	0	0	0
Bordetella_pertussis_strain=VA-15	1	0	0	0	0	0	0
Bordetella_pertussis_strain=VA-150	1	0	0	0	0	0	0
Bordetella_pertussis_strain=VA-175	1	0	0	0	0	0	0
Bordetella_pertussis_strain=VA-18	1	0	0	0	0	0	0
Bordetella_pertussis_strain=VA-190	1	0	0	0	0	0	0
Bordetella_pertussis_strain=VA-194	1	0	0	0	0	0	0
Bordetella_pertussis_strain=VA-198	1	0	0	0	0	0	0
Bordetella_pertussis_strain=VA-62	1	0	0	0	0	0	0
Bordetella_pertussis_strain=VA-UT25Sm1	1	0	0	0	0	0	0
Bordetella_pertussis_Tohama_I_strain=Tohama_I	1	0	0	0	0	0	0
Bordetella_petrii_strain=DSM_12804	1	0	0	0	0	0	0
Bordetella_pseudohinzii_strain=HI4681	1	0	0	0	0	0	0
Bordetella_trematum_strain=H044680328	1	0	0	0	0	0	0
Bosea_sp._RAC05_strain=RAC05	1	0	0	0	0	0	0
Bosea_vaviloviae_strain=Vaf18	1	0	0	0	0	0	0
Brachyspira_hyodysenteriae_ATCC_27164_strain=B-78	0	0	0	0	0	1	0
Brachyspira_hyodysenteriae_WA1_strain=WA1;_ATCC_49526	0	0	0	0	0	1	0
Bradyrhizobium_diazoefficiens_strain=NK6	1	0	0	0	0	0	0
Bradyrhizobium_diazoefficiens_strain=USDA_122	1	0	0	0	0	0	0
Bradyrhizobium_diazoefficiens_USDA_110_strain=USDA110	1	0	0	0	0	0	0
Bradyrhizobium_diazoefficiens_USDA_110_strain=USDA_110	1	0	0	0	0	0	0
Bradyrhizobium_icense_strain=LMTR_13	1	0	0	0	0	0	0
Bradyrhizobium_japonicum_strain=E109	1	1	0	0	0	0	0
Bradyrhizobium_japonicum_strain=J5	1	0	0	0	0	0	0
Bradyrhizobium_japonicum_USDA_6_strain=USDA_6	1	1	0	0	0	0	0
Bradyrhizobium_oligotrophicum_S58_strain=S58	1	0	0	0	0	0	0
Bradyrhizobium_sp._BF49_genome1	1	0	0	0	0	0	0
Bradyrhizobium_sp._BTAi1_strain=BTAi1	1	0	0	0	0	0	0
Bradyrhizobium_sp._CCGE-LA001_strain=CCGE-LA001	1	0	0	0	0	0	0
Bradyrhizobium_sp._ORS_278_strain=ORS278	1	0	0	1	0	0	0
Bradyrhizobium_sp._ORS_285_strain=ORS285	1	0	0	1	0	0	0
Bradyrhizobium_sp._S23321_strain=S23321	1	0	0	0	0	0	0
Brevibacillus_brevis_NBRC_100599_strain=NBRC_100599_=_47	1	1	0	0	0	0	0
Brevibacillus_formosus_strain=NF2	1	1	0	0	0	0	0
Brevundimonas_naejangsanensis_strain=B1	1	0	0	0	0	0	0
Brevundimonas_subvibrioides_ATCC_15264_strain=ATCC_15264	1	0	0	0	0	0	0
Burkholderia_ambifaria_AMMD_strain=AMMD	1	0	0	0	0	0	0
Burkholderia_ambifaria_MC40-6_strain=MC40-6	1	0	0	0	0	0	0
Burkholderia_cenocepacia_AU_1054_strain=AU_1054	1	0	0	0	0	0	0
Burkholderia_cenocepacia_H111_strain=H111	1	1	0	0	0	0	0
Burkholderia_cenocepacia_HI2424_strain=HI2424	1	0	0	0	0	0	0
Burkholderia_cenocepacia_J2315_strain=J2315	1	1	0	0	0	0	0
Burkholderia_cenocepacia_MC0-3_strain=MC0-3	1	0	1	0	0	0	0
Burkholderia_cenocepacia_strain=842	1	0	0	0	0	0	0
Burkholderia_cenocepacia_strain=895	1	0	0	0	0	0	0
Burkholderia_cenocepacia_strain=CR318	1	0	0	0	0	0	0
Burkholderia_cenocepacia_strain=DDS_22E-1	1	0	0	0	0	0	0
Burkholderia_cenocepacia_strain=DWS_37E-2	1	0	0	0	0	0	0
Burkholderia_cenocepacia_strain=FL-5-3-30-S1-D7	1	0	0	0	0	0	0
Burkholderia_cenocepacia_strain=MSMB384WGS	1	0	0	0	0	0	0
Burkholderia_cenocepacia_strain=ST32_1232	1	0	0	0	0	0	0
Burkholderia_cenocepacia_strain=VC12308	1	0	0	0	0	0	0
Burkholderia_cenocepacia_strain=VC12802	1	0	0	0	0	0	0
Burkholderia_cenocepacia_strain=VC7848	1	0	0	0	0	0	0
Burkholderia_cepacia_ATCC_25416_strain=UCB_717	1	0	0	0	0	0	0
Burkholderia_cepacia_GG4_strain=GG4	1	0	0	0	0	0	0
Burkholderia_cepacia_strain=DDS_7H-2	1	0	0	0	0	0	0
Burkholderia_cepacia_strain=FDAARGOS_345	1	0	0	0	0	0	0
Burkholderia_cepacia_strain=INT3-BP177	1	0	0	0	0	0	0
Burkholderia_cepacia_strain=LO6	1	0	0	0	0	0	0
Burkholderia_contaminans_strain=MS14	1	0	0	0	0	0	0
Burkholderia_diffusa_strain=RF2-non-BP9	1	0	0	0	0	0	0
Burkholderia_dolosa_AU0158_strain=AU0158	1	0	0	0	0	0	0
Burkholderia_gladioli_BSR3_strain=BSR3	1	0	0	0	0	0	0
Burkholderia_gladioli_pv._gladioli_strain=KACC_11889	1	0	0	0	0	0	0
Burkholderia_gladioli_strain=ATCC_10248	1	0	0	0	0	0	0
Burkholderia_glumae_BGR1_strain=BGR1	1	0	0	0	0	0	0
Burkholderia_glumae_LMG_2196_=_ATCC_33617_strain=ATCC_33617	1	0	0	0	0	0	0
Burkholderia_glumae_PG1_strain=PG1	1	0	0	0	0	0	0
Burkholderia_lata_strain=383	1	1	0	0	0	0	1
Burkholderia_lata_strain=FL-7-5-30-S1-D0	1	0	0	0	0	0	0
Burkholderia_latens_strain=AU17928_AU17928	1	0	0	0	0	0	0
Burkholderia_mallei_ATCC_23344_strain=ATCC_23344	1	1	0	0	0	0	0
Burkholderia_mallei_NCTC_10229_strain=NCTC_10229	1	1	0	0	0	0	0
Burkholderia_mallei_NCTC_10247_strain=NCTC_10247	1	1	0	0	0	0	0
Burkholderia_mallei_SAVP1_strain=SAVP1	1	0	0	0	0	0	0
Burkholderia_mallei_strain=11	1	1	0	0	0	0	0
Burkholderia_mallei_strain=2000031063	1	1	0	0	0	0	0
Burkholderia_mallei_strain=2002721276	1	0	0	0	0	0	0
Burkholderia_mallei_strain=2002734299_SR092700C	1	1	0	0	0	0	0
Burkholderia_mallei_strain=2002734306	1	1	0	0	0	0	0
Burkholderia_mallei_strain=23344	1	0	0	0	0	0	0
Burkholderia_mallei_strain=6	1	1	0	0	0	0	0
Burkholderia_mallei_strain=Bahrain1	1	0	0	0	0	0	0
Burkholderia_mallei_strain=BMQ	1	0	0	0	0	0	0
Burkholderia_mallei_strain=FMH_23344	1	1	0	0	0	0	0
Burkholderia_mallei_strain=India86-567-2	1	1	0	0	0	0	0
Burkholderia_metallica_strain=FL-6-5-30-S1-D7	1	0	0	0	0	0	0
Burkholderia_multivorans_ATCC_17616_strain=ATCC_17616	1	0	0	0	0	0	0
Burkholderia_multivorans_ATCC_BAA-247_strain=ATCC_BAA-247	1	1	0	0	0	0	0
Burkholderia_multivorans_strain=AU1185_AU1185	1	1	0	0	0	0	0
Burkholderia_multivorans_strain=DDS_15A-1	1	0	0	0	0	0	0
Burkholderia_multivorans_strain=MSMB1640WGS	1	0	0	0	0	0	0
Burkholderia_oklahomensis_strain=EO147	1	0	0	0	0	0	0
Burkholderia_plantarii_strain=ATCC_43733	1	0	0	0	0	0	0
Burkholderia_pseudomallei_1026b_strain=1026b	1	1	0	0	0	0	0
Burkholderia_pseudomallei_1106a_strain=1106a	1	1	0	0	0	0	0
Burkholderia_pseudomallei_1710b_strain=1710b	1	0	0	0	0	0	0
Burkholderia_pseudomallei_406e_strain=406e	1	1	0	0	0	0	0
Burkholderia_pseudomallei_576_strain=576	1	1	0	0	0	0	0
Burkholderia_pseudomallei_668_strain=668	1	1	0	0	0	0	0
Burkholderia_pseudomallei_7894_strain=7894	1	0	0	0	0	0	0
Burkholderia_pseudomallei_A79A_strain=A79A	1	1	0	0	0	0	0
Burkholderia_pseudomallei_B03_strain=B03	1	1	0	0	0	0	0
Burkholderia_pseudomallei_HBPUB10134a_strain=HBPUB10134a	1	1	0	0	0	0	0
Burkholderia_pseudomallei_HBPUB10303a_strain=HBPUB10303a	1	1	0	0	0	0	0
Burkholderia_pseudomallei_K42_strain=K42	1	1	0	0	0	0	0
Burkholderia_pseudomallei_K96243_strain=K96243	1	1	0	0	0	0	0
Burkholderia_pseudomallei_MSHR146_strain=MSHR146	1	1	0	0	0	0	0
Burkholderia_pseudomallei_MSHR2543_strain=MSHR2543	1	0	0	0	0	0	0
Burkholderia_pseudomallei_MSHR305_strain=MSHR305	1	1	1	0	0	0	0
Burkholderia_pseudomallei_MSHR491_strain=MSHR491	1	1	0	0	0	0	0
Burkholderia_pseudomallei_MSHR511_strain=MSHR511	1	1	0	0	0	0	0
Burkholderia_pseudomallei_MSHR520_strain=MSHR520	1	1	0	0	0	0	0
Burkholderia_pseudomallei_MSHR5848_strain=MSHR5848	1	1	0	0	0	0	0
Burkholderia_pseudomallei_MSHR5855_strain=MSHR5855	1	1	0	0	0	0	0
Burkholderia_pseudomallei_MSHR5858_strain=MSHR5858	1	1	0	0	0	0	0
Burkholderia_pseudomallei_MSHR62_strain=MSHR62	1	1	0	0	0	0	0
Burkholderia_pseudomallei_MSHR840_strain=MSHR840	1	1	0	0	0	0	0
Burkholderia_pseudomallei_NAU20B-16_strain=NAU20B-16	1	1	0	0	0	0	0
Burkholderia_pseudomallei_NAU35A-3_strain=NAU35A-3	1	1	0	0	0	0	0
Burkholderia_pseudomallei_NCTC_13178_strain=NCTC_13178	1	1	0	0	0	0	0
Burkholderia_pseudomallei_NCTC_13179_strain=NCTC_13179	1	1	0	0	0	0	0
Burkholderia_pseudomallei_Pasteur_52237_strain=Pasteur_52237	1	1	0	0	0	0	0
Burkholderia_pseudomallei_PB08298010_strain=PB08298010	1	1	0	0	0	0	0
Burkholderia_pseudomallei_strain=1106a	1	1	0	0	0	0	0
Burkholderia_pseudomallei_strain=2002721123	1	0	0	0	0	0	0
Burkholderia_pseudomallei_strain=2002721171	1	0	0	0	0	0	0
Burkholderia_pseudomallei_strain=2002721184	1	0	0	0	0	0	0
Burkholderia_pseudomallei_strain=2002734728	1	0	0	0	0	0	0
Burkholderia_pseudomallei_strain=2008724734	1	1	0	0	0	0	0
Burkholderia_pseudomallei_strain=2008724758	1	1	0	0	0	0	0
Burkholderia_pseudomallei_strain=2008724860	1	0	0	0	0	0	0
Burkholderia_pseudomallei_strain=2010007509	1	0	0	0	0	0	0
Burkholderia_pseudomallei_strain=2011756189	1	0	0	0	0	0	0
Burkholderia_pseudomallei_strain=2011756295	1	1	0	0	0	0	0
Burkholderia_pseudomallei_strain=2013746777	1	0	0	0	0	0	0
Burkholderia_pseudomallei_strain=2013746811	1	1	0	0	0	0	0
Burkholderia_pseudomallei_strain=2013746877	1	0	0	0	0	0	0
Burkholderia_pseudomallei_strain=2013746878	1	0	0	0	0	0	0
Burkholderia_pseudomallei_strain=2013833055	1	1	1	0	0	0	0
Burkholderia_pseudomallei_strain=2013833057	0	0	1	0	0	0	0
Burkholderia_pseudomallei_strain=3000015237	1	0	0	0	0	0	0
Burkholderia_pseudomallei_strain=3000015486	1	0	0	0	0	0	0
Burkholderia_pseudomallei_strain=3000047530	1	0	0	0	0	0	0
Burkholderia_pseudomallei_strain=3000465972	1	0	0	0	0	0	0
Burkholderia_pseudomallei_strain=3921	1	1	0	0	0	0	0
Burkholderia_pseudomallei_strain=982	1	1	0	0	0	0	0
Burkholderia_pseudomallei_strain=BDP	1	1	0	0	0	0	0
Burkholderia_pseudomallei_strain=BGR	1	1	0	0	0	0	0
Burkholderia_pseudomallei_strain=Bp1651	1	1	0	0	0	0	0
Burkholderia_pseudomallei_strain=BSR	1	1	0	0	0	0	0
Burkholderia_pseudomallei_strain=Burk178-Type1	1	1	0	0	0	0	0
Burkholderia_pseudomallei_strain=Burk178-Type2	1	1	0	0	0	0	0
Burkholderia_pseudomallei_strain=M1	1	0	0	0	0	0	0
Burkholderia_pseudomallei_strain=Mahidol-1106a	1	1	0	0	0	0	0
Burkholderia_pseudomallei_strain=MS	1	0	0	0	0	0	0
Burkholderia_pseudomallei_strain=MSHR1655	1	1	0	0	0	0	0
Burkholderia_pseudomallei_strain=MSHR3763	1	1	0	0	0	0	0
Burkholderia_pseudomallei_strain=MSHR4083	1	1	0	0	0	0	0
Burkholderia_pseudomallei_strain=MSHR5864	1	1	0	0	0	0	0
Burkholderia_pseudomallei_strain=MSHR668	1	1	0	0	0	0	0
Burkholderia_pseudomallei_strain=MSHR7929	1	1	0	0	0	0	0
Burkholderia_pseudomallei_strain=PHLS_112	1	1	0	0	0	0	0
Burkholderia_pseudomallei_strain=TSV202	1	1	0	0	0	0	0
Burkholderia_pseudomallei_strain=VB976100	1	0	0	0	0	0	0
Burkholderia_pseudomallei_strain=vgh07	1	1	0	0	0	0	0
Burkholderia_pseudomallei_strain=vgh16R	1	1	0	0	0	0	0
Burkholderia_pseudomallei_strain=vgh16W	1	1	0	0	0	0	0
Burkholderia_pseudomallei_TSV_48_strain=TSV_48	1	1	0	0	0	0	0
Burkholderia_pseudomultivorans_strain=SUB-INT23-BP2	1	0	0	0	0	0	0
Burkholderia_pyrrocinia_strain=DSM_10685	1	0	0	0	0	0	0
Burkholderia_seminalis_strain=FL-5-4-10-S1-D7	1	0	0	0	0	0	0
Burkholderia_sp._2002721687_strain=2002721687	1	1	0	0	0	0	0
Burkholderia_sp._Bp5365_strain=MSMB43	1	1	0	0	0	0	0
Burkholderia_sp._Bp7605_strain=MSMB0175	1	0	0	0	0	0	0
Burkholderia_sp._CCGE1001_strain=CCGE1001	1	1	1	0	0	0	0
Burkholderia_sp._CCGE1002_strain=CCGE1002	1	0	0	0	0	1	0
Burkholderia_sp._CCGE1003_strain=CCGE1003	1	0	0	0	0	0	0
Burkholderia_sp._HB1_strain=HB1	1	0	0	0	0	0	0
Burkholderia_sp._KJ006_strain=KJ006	1	0	0	0	0	0	0
Burkholderia_sp._MSMB0266_strain=MSMB0266	1	1	0	0	0	0	0
Burkholderia_sp._MSMB0852_strain=MSMB0852	1	1	0	0	0	0	0
Burkholderia_sp._OLGA172_strain=OLGA172	1	0	0	0	0	0	0
Burkholderia_sp._PAMC_26561_strain=PAMC_26561	1	0	0	0	0	0	0
Burkholderia_sp._PAMC_28687_strain=PAMC28687	1	0	0	0	0	0	0
Burkholderia_sp._RPE64	1	1	0	0	0	0	0
Burkholderia_sp._RPE67_strain=RPE67	1	1	0	0	0	0	0
Burkholderia_stabilis_strain=ATCC_BAA-67	1	1	0	0	0	0	0
Burkholderia_stagnalis_strain=MSMB735WGS	1	0	0	0	0	0	0
Burkholderia_territorii_strain=RF8-non-BP5	1	0	0	0	0	0	0
Burkholderia_thailandensis_2002721643_strain=2002721643	1	0	0	0	0	0	0
Burkholderia_thailandensis_2002721723_strain=2002721723	1	0	0	0	0	0	0
Burkholderia_thailandensis_34_strain=34	1	0	0	0	0	0	0
Burkholderia_thailandensis_E254_strain=E254	1	0	0	0	0	0	0
Burkholderia_thailandensis_E264_strain=E264;_ATCC_700388	1	0	0	0	0	0	0
Burkholderia_thailandensis_E444_strain=E444	1	0	0	0	0	0	0
Burkholderia_thailandensis_H0587_strain=H0587	1	0	0	0	0	0	0
Burkholderia_thailandensis_MSMB121_strain=MSMB121	1	1	0	0	0	0	0
Burkholderia_thailandensis_MSMB59_strain=MSMB59	1	0	0	0	0	0	0
Burkholderia_thailandensis_strain=2002721121	1	0	0	0	0	0	0
Burkholderia_thailandensis_strain=2002721643	1	0	0	0	0	0	0
Burkholderia_thailandensis_strain=2003015869	1	0	0	0	0	0	0
Burkholderia_thailandensis_USAMRU_Malaysia_#20_strain=USAMRU_Malaysia_#20	1	0	0	0	0	0	0
Burkholderia_ubonensis_MSMB22_strain=MSMB22	1	0	0	0	0	0	0
Burkholderia_ubonensis_strain=MSMB0783	1	0	0	0	0	0	0
Burkholderia_ubonensis_strain=MSMB1189WGS_MSMB1189WGS	1	0	0	0	0	0	0
Burkholderia_ubonensis_strain=MSMB1471WGS	1	0	0	0	0	0	0
Burkholderia_ubonensis_strain=MSMB2035	1	0	0	0	0	0	0
Burkholderia_ubonensis_strain=RF23-BP41	1	0	0	0	0	0	0
Burkholderia_vietnamiensis_G4_strain=G4	1	0	0	0	0	0	0
Burkholderia_vietnamiensis_LMG_10929_strain=LMG_10929	1	0	0	0	0	0	0
Burkholderia_vietnamiensis_strain=AU1233	1	0	0	0	0	0	0
Burkholderia_vietnamiensis_strain=FL-2-3-30-S1-D0	1	0	0	0	0	0	0
Burkholderia_vietnamiensis_strain=HI2297	1	0	0	0	0	0	0
Burkholderia_vietnamiensis_strain=MSMB608WGS	1	0	0	0	0	0	0
Caldanaerobacter_subterraneus_subsp._tengcongensis_MB4_strain=MB4	0	0	0	0	0	1	0
Candidatus_Izimaplasma_sp._HR1_strain=HR1	0	0	0	0	0	1	0
Candidatus_Koribacter_versatilis_Ellin345_strain=Ellin345	1	1	0	0	0	0	0
Castellaniella_defragrans_65Phen_strain=65Phen	0	1	0	0	0	1	0
Catenulispora_acidiphila_DSM_44928_strain=DSM_44928	1	0	0	0	0	0	0
Caulobacteraceae_bacterium_OTSz_A_272_strain=OTSz_A_272	0	1	0	0	0	0	0
Caulobacter_sp._K31_strain=K31	1	0	0	0	0	0	0
Cedecea_davisae_DSM_4568	0	0	0	1	0	0	0
Cellulophaga_algicola_DSM_14237_strain=DSM_14237	1	1	0	0	0	0	0
Cellulophaga_baltica_18_strain=18	1	1	0	0	0	0	0
Cellulophaga_baltica_NN016038_strain=NN016038	1	1	0	0	0	0	0
Cellulophaga_lytica_DSM_7489_strain=DSM_7489	1	1	0	0	0	0	0
Cellulophaga_lytica_strain=DAU203	1	1	0	0	0	0	0
Cellulophaga_lytica_strain=HI1	1	1	0	0	0	0	0
Cellulosimicrobium_cellulans_strain=PSBB019	0	1	0	0	0	0	0
Cellulosimicrobium_sp._TH-20_strain=TH-20	0	1	0	0	0	0	0
Chelatococcus_sp._CO-6_strain=CO-6	0	1	0	0	0	0	0
Chloracidobacterium_thermophilum_B_strain=B	1	1	0	0	0	0	0
Chloroflexus_aggregans_DSM_9485_strain=DSM_9485	0	0	0	0	0	0	1
Chloroflexus_aurantiacus_J-10-fl_strain=J-10-fl	0	0	0	0	0	0	1
Chromobacterium_violaceum_ATCC_12472_strain=ATCC_12472	0	0	0	0	0	1	0
Chroococcidiopsis_thermalis_PCC_7203_strain=PCC_7203	1	0	0	0	0	0	0
Citrobacter_amalonaticus_Y19_strain=Y19	0	0	0	0	0	1	0
Citrobacter_freundii_4_7_47CFAA	0	0	0	1	0	1	0
Citrobacter_koseri_0123A_53_520	0	0	0	0	0	1	0
Citrobacter_koseri_ATCC_BAA-895_strain=ATCC_BAA-895	0	0	0	0	0	1	0
Citrobacter_koseri_strain=FDAARGOS_287	0	0	0	0	0	1	0
Citrobacter_sp._30_2	0	0	0	1	0	1	0
Citrobacter_youngae_ATCC_29220	0	0	0	1	0	1	0
Citromicrobium_sp._JL477_strain=JL477	1	0	0	0	0	0	0
Clostridiales_bacterium_1_7_47FAA	0	0	0	0	0	1	0
Clostridium_argentinense_strain=89G	0	1	0	0	0	0	0
Clostridium_botulinum_202F_strain=202F	0	0	0	0	0	1	0
Clostridium_botulinum_A2_str._Kyoto_strain=Kyoto	0	0	0	0	0	1	0
Clostridium_botulinum_A3_str._Loch_Maree_strain=Loch_Maree	0	0	0	0	0	1	0
Clostridium_botulinum_A_str._ATCC_19397_strain=ATCC_19397	0	0	0	0	0	1	0
Clostridium_botulinum_A_str._ATCC_3502_strain=ATCC_3502	0	0	0	0	1	1	0
Clostridium_botulinum_A_str._Hall_strain=Hall	0	0	0	0	0	1	0
Clostridium_botulinum_B1_str._Okra_strain=Okra	0	1	0	0	0	1	0
Clostridium_botulinum_Ba4_str._657_strain=657	0	0	0	0	0	1	0
Clostridium_botulinum_BKT015925_strain=BKT015925	0	0	0	0	0	1	0
Clostridium_botulinum_B_str._Eklund_17B_NRP_strain=B_str._Eklund_17BNRP	0	0	0	0	0	1	0
Clostridium_botulinum_B_str._Eklund_17B_NRP_strain=Eklund_17B	0	0	0	0	0	1	0
Clostridium_botulinum_CDC_1436_strain=CDC_1436	0	0	0	0	0	1	0
Clostridium_botulinum_CDC_297_strain=CDC_297	0	0	0	0	0	1	0
Clostridium_botulinum_E3_str._Alaska_E43_strain=Alaska_E43	0	0	0	0	0	1	0
Clostridium_botulinum_F_str._230613_strain=230613	0	0	0	0	1	1	0
Clostridium_botulinum_F_str._Langeland_strain=Langeland	0	0	0	0	0	1	0
Clostridium_botulinum_H04402_065_strain=H04402_065	0	0	0	0	1	1	0
Clostridium_botulinum_strain=111	0	0	0	0	0	1	0
Clostridium_botulinum_strain=CDC_1632	0	0	0	0	0	1	0
Clostridium_botulinum_strain=CDC_53174	0	0	0	0	0	1	0
Clostridium_botulinum_strain=CDC_67190	0	0	0	0	0	1	0
Clostridium_botulinum_strain=CDC_69094	0	0	0	0	0	1	0
Clostridium_botulinum_strain=NCTC_8266	0	0	0	0	0	1	0
Clostridium_botulinum_strain=NCTC_8550	0	0	0	0	0	1	0
Clostridium_hathewayi_WAL-18680	0	1	0	0	0	0	0
Clostridium_kluyveri_DSM_555_strain=DSM_555	0	1	0	0	0	0	0
Clostridium_kluyveri_NBRC_12016_strain=NBRC_12016	0	1	0	0	0	0	0
Clostridium_kluyveri_strain=JZZ	0	1	0	0	0	0	0
Clostridium_novyi_NT_strain=NT	0	0	0	0	0	1	0
Clostridium_saccharolyticum_WM1_strain=WM1	0	0	0	0	0	1	0
Clostridium_scatologenes_strain=ATCC_25775	0	1	0	0	0	0	0
Clostridium_sporogenes_ATCC_15579	0	0	1	0	1	0	1
Clostridium_sporogenes_strain=DSM_795	0	0	0	0	1	0	0
Clostridium_sporogenes_strain=NCIMB_10696	0	0	0	0	1	0	0
Clostridium_tetani_12124569_strain=12124569	0	0	0	0	0	1	0
Clostridium_tetani_E88_strain=Massachusetts_substr._E88	0	0	0	0	0	1	0
Cnuibacter_physcomitrellae_strain=XAT	1	0	0	0	0	0	0
Collimonas_arenae_strain=Cal35	1	0	0	0	0	0	0
Collimonas_arenae_strain=Ter10	1	0	0	0	0	0	0
Collimonas_arenae_strain=Ter282	1	0	0	0	0	0	0
Collimonas_fungivorans_strain=Ter6	1	0	0	0	0	0	0
Collimonas_fungivorans_Ter331_strain=Ter331	1	0	0	0	0	0	0
Collimonas_pratensis_strain=Ter291	1	0	0	0	0	0	0
Collimonas_pratensis_strain=Ter91	1	0	0	0	0	0	0
Collinsella_tanakaei_YIT_12063	0	0	0	0	0	0	1
Colwellia_psychrerythraea_34H_strain=34H;_BAA-681	0	1	0	0	0	0	0
Colwellia_sp._NB097-1_strain=NB097-1	1	1	0	0	0	0	0
Colwellia_sp._PAMC_20917_strain=PAMC_20917	1	1	0	0	0	0	0
Colwellia_sp._PAMC_21821_strain=PAMC_21821	1	1	0	0	0	0	0
Comamonas_testosteroni_CNB-2_strain=CNB-1_substr._CNB-2	1	0	0	0	0	0	0
Comamonas_testosteroni_TK102_strain=TK102	1	0	0	0	0	0	0
Coprobacillus_sp._29_1	0	1	0	0	0	0	0
Coprococcus_sp._HPP0048	0	0	0	0	0	0	1
Coprococcus_sp._HPP0074	0	0	0	0	0	0	1
Corallococcus_coralloides_DSM_2259_strain=DSM_2259	0	1	0	0	0	0	0
Corynebacterium_ammoniagenes_DSM_20306	0	0	1	1	0	0	0
Corynebacterium_ammoniagenes_DSM_20306_strain=DSM_20306_=_9.6	0	0	1	1	0	0	0
Corynebacterium_marinum_DSM_44953_strain=DSM_44953	0	0	0	0	0	1	0
Crinalium_epipsammum_PCC_9333_strain=PCC_9333	1	0	0	0	0	0	0
Croceibacter_atlanticus_HTCC2559_strain=HTCC2559	1	1	0	0	0	0	0
Cronobacter_condimenti_1330_strain=LMG_26250	0	0	0	0	0	1	0
Cronobacter_dublinensis_subsp._dublinensis_LMG_23823_strain=LMG_23823	0	0	0	0	0	1	0
Cronobacter_muytjensii_ATCC_51329_strain=ATCC_51329	0	0	0	0	0	1	0
Cronobacter_turicensis_z3032	0	0	0	1	0	0	0
Cupriavidus_basilensis_strain=4G11	1	1	0	0	0	0	0
Cupriavidus_gilardii_CR3_strain=CR3	1	0	0	0	0	0	0
Cupriavidus_metallidurans_CH34_strain=CH34	1	1	0	0	0	0	0
Cupriavidus_necator_N-1_strain=N-1	1	0	0	0	0	0	0
Cupriavidus_necator_strain=NH9	1	0	0	0	0	0	0
Cupriavidus_sp._USMAA1020_strain=USMAA1020_pure	1	1	0	0	0	0	0
Cupriavidus_sp._USMAA2-4_strain=USMAA2-4_pure	1	1	0	0	0	0	0
Cupriavidus_sp._USMAHM13_strain=USMAHM13_pure	1	1	0	0	0	0	0
Cyanothece_sp._ATCC_51142_strain=ATCC_51142	0	0	0	0	0	0	1
Cyanothece_sp._PCC_7424_strain=PCC_7424	0	0	0	0	0	0	1
Cyanothece_sp._PCC_7425_strain=PCC_7425	0	0	0	0	0	0	1
Cyanothece_sp._PCC_7822_strain=PCC_7822	0	0	0	0	0	0	1
Cyanothece_sp._PCC_8801_strain=PCC_8801	0	0	0	0	0	0	1
Cyanothece_sp._PCC_8802_strain=PCC_8802	0	0	0	0	0	0	1
Cyclobacterium_amurskyense_strain=KCTC_12363	1	1	0	0	0	0	0
Cyclobacterium_marinum_DSM_745_strain=DSM_745	0	1	0	0	0	0	0
Cycloclasticus_zancles_78-ME_strain=78-ME	0	0	0	0	0	0	1
Cytophaga_hutchinsonii_ATCC_33406_strain=ATCC_33406	0	1	0	0	0	0	0
Deinococcus_deserti_VCD115_strain=VCD115	1	0	0	0	0	0	0
Deinococcus_geothermalis_DSM_11300_strain=DSM_11300	1	0	0	0	0	0	0
Deinococcus_gobiensis_I-0_strain=I-0	1	0	0	0	0	0	0
Deinococcus_maricopensis_DSM_21211_strain=DSM_21211	1	0	0	0	0	0	0
Deinococcus_peraridilitoris_DSM_19664_strain=DSM_19664	1	0	0	0	0	0	0
Deinococcus_proteolyticus_MRP_strain=MRP	1	0	0	0	0	0	0
Delftia_acidovorans_SPH-1_strain=SPH-1	1	0	0	0	0	0	0
Delftia_sp._Cs1-4_strain=Cs1-4	1	0	0	0	0	0	0
Delftia_sp._HK171_strain=HK171	1	0	0	0	0	0	0
Delftia_tsuruhatensis_strain=CM13	1	0	0	0	0	0	0
Desulfitobacterium_dehalogenans_ATCC_51507_strain=ATCC_51507	0	0	0	0	0	1	0
Desulfitobacterium_hafniense_DCB-2_strain=DCB-2	0	0	0	0	0	1	0
Desulfitobacterium_hafniense_DP7	0	0	1	0	0	1	0
Desulfitobacterium_hafniense_Y51_strain=Y51	0	0	0	0	0	1	0
Desulfosporosinus_acidiphilus_SJ4_strain=SJ4	0	0	0	0	0	1	0
Desulfosporosinus_orientis_DSM_765_strain=DSM_765	0	0	0	0	0	1	0
Desulfotomaculum_reducens_MI-1_strain=MI-1	0	0	0	0	0	1	0
Desulfotomaculum_ruminis_DSM_2154_strain=DSM_2154	0	1	0	0	0	0	0
Desulfovibrio_alaskensis_G20_strain=G20	0	0	0	1	0	0	1
Desulfovibrio_desulfuricans_ND132_strain=ND132	0	0	0	1	0	0	1
Desulfovibrio_desulfuricans_subsp._desulfuricans_str._ATCC_27774_strain=ATCC_27774	0	0	0	1	0	0	1
Desulfovibrio_vulgaris_DP4_strain=DP4	0	0	0	0	0	1	1
Desulfovibrio_vulgaris_RCH1_strain=RCH1	0	0	0	0	0	1	1
Desulfovibrio_vulgaris_str._Hildenborough_strain=Hildenborough	0	0	0	0	0	1	1
Desulfovibrio_vulgaris_str._'Miyazaki_F'_strain=Miyazaki_F	0	0	0	0	0	1	1
Diaphorobacter_polyhydroxybutyrativorans_strain=SL-205	1	0	0	0	0	0	0
Dickeya_chrysanthemi_Ech1591_strain=Ech1591	0	0	0	0	0	1	0
Dickeya_dadantii_3937_strain=3937	0	0	1	0	0	1	0
Dickeya_paradisiaca_Ech703_strain=Ech703	0	0	0	0	0	1	0
Dickeya_zeae_EC1_strain=EC1	0	0	0	0	0	1	0
Dickeya_zeae_Ech586_strain=Ech586	0	0	0	0	0	1	0
Dokdonella_koreensis_DS-123_strain=DS-123	0	1	0	0	0	0	0
Dokdonia_donghaensis_DSW-1_strain=DSW-1	1	1	0	0	0	0	0
Dokdonia_sp._4H-3-7-5_strain=4H-3-7-5	1	1	0	0	0	0	0
Dokdonia_sp._MED134_strain=MED134	1	1	0	0	0	0	0
Dyella_japonica_A8_strain=A8	0	1	0	0	0	0	0
Dyella_jiangningensis_strain=SBZ_3-12	0	1	0	0	0	0	0
Dyella_thiooxydans_strain=ATSB10	0	1	0	0	0	0	0
Dysgonomonas_gadei_ATCC_BAA-286	0	0	0	0	0	1	0
Dysgonomonas_mossii_DSM_22836	0	0	0	0	0	1	0
Echinicola_vietnamensis_DSM_17526_strain=DSM_17526	0	1	0	0	0	0	0
Edwardsiella_anguillarum_ET080813_strain=ET080813	0	0	0	0	0	1	0
Edwardsiella_tarda_ATCC_23685	0	0	0	1	0	1	0
Edwardsiella_tarda_EIB202_strain=EIB202	0	0	0	0	0	1	0
Edwardsiella_tarda_FL6-60_strain=FL6-60	0	0	0	0	0	1	0
Edwardsiella_tarda_strain=FL95-01	0	0	0	0	0	1	0
Eggerthella_sp._YY7918_strain=YY7918	0	0	0	0	1	0	0
Elusimicrobium_minutum_Pei191_strain=Pei191	0	0	0	0	0	1	0
Ensifer_adhaerens_strain=Casida_A	1	1	0	0	0	0	0
Enterobacter_cancerogenus_ATCC_35316	0	0	0	1	0	0	0
Enterobacter_cloacae_subsp._cloacae_NCTC_9394	0	0	0	1	0	0	0
Enterobacteriaceae_bacterium_9_2_54FAA	0	0	0	1	0	0	0
Enterobacter_lignolyticus_SCF1_strain=SCF1	0	0	0	0	0	1	0
Erwinia_billingiae_Eb661_strain=Eb661	0	0	0	1	0	0	0
Erythrobacter_flavus_strain=VG1	1	0	0	0	0	0	0
Erythrobacter_litoralis_HTCC2594_strain=HTCC2594	1	0	0	0	0	0	0
Escherichia_albertii_KF1_strain=KF1	0	0	0	0	0	1	0
Escherichia_albertii_strain=EC06-170	0	0	0	0	1	0	0
Escherichia_albertii_strain=NIAH_Bird_3	0	0	0	0	1	0	0
Escherichia_coli_042_strain=042	0	0	0	0	0	1	0
Escherichia_coli_1303_strain=1303	0	0	0	0	0	1	0
Escherichia_coli_4_1_47FAA	0	0	0	0	0	1	0
Escherichia_coli_536_strain=536	0	0	0	0	0	1	0
Escherichia_coli_55989_strain=55989	0	0	0	0	0	1	0
Escherichia_coli_ABU_83972_strain=ABU_83972	0	0	0	0	0	1	0
Escherichia_coli_ACN001_strain=ACN001	0	0	0	0	0	1	0
Escherichia_coli_APEC_IMT5155_strain=APEC_IMT5155	0	0	0	0	0	1	0
Escherichia_coli_APEC_O18_strain=APEC_O18	0	0	0	0	0	1	0
Escherichia_coli_APEC_O1_strain=APEC_O1	0	0	0	0	0	1	0
Escherichia_coli_APEC_O2-211_strain=APEC_O2-211	0	0	0	0	0	1	0
Escherichia_coli_APEC_O78_strain=APEC_O78	0	0	0	0	0	1	0
Escherichia_coli_ATCC_25922_strain=ATCC_25922	0	0	0	0	0	1	0
Escherichia_coli_ATCC_8739_strain=ATCC_8739	0	0	0	0	0	1	0
Escherichia_coli_B7A_strain=B7A	0	0	0	0	0	1	0
Escherichia_coli_BL21DE3_strain=BL21DE3	0	0	0	0	0	1	0
Escherichia_coli_'BL21-GoldDE3pLysS_AG'_strain=BL21-GoldDE3pLysS_AG	0	0	0	0	0	1	0
Escherichia_coli_B_strain=C2566	0	0	0	0	0	1	0
Escherichia_coli_B_strain=C3029	0	0	0	0	0	1	0
Escherichia_coli_B_str._REL606_strain=REL606	0	0	0	0	0	1	0
Escherichia_coli_BW25113_strain=K-12_substr._BW25113	0	0	0	0	0	1	0
Escherichia_coli_BW2952_strain=K-12_substr._BW2952	0	0	0	0	0	1	0
Escherichia_coli_CFT073_strain=CFT073	0	0	0	0	0	1	0
Escherichia_coli_C_strain=C	0	0	0	0	0	1	0
Escherichia_coli_D9	0	0	0	0	0	1	0
Escherichia_coli_DH1_strain=DH1	0	0	0	0	0	1	0
Escherichia_coli_ECC-1470_strain=ECC-1470	0	0	0	0	0	1	0
Escherichia_coli_ER2796_strain=ER2796	0	0	0	0	0	1	0
Escherichia_coli_ETEC_H10407_strain=ETEC_H10407	0	0	0	0	0	1	0
Escherichia_coli_HS_strain=HS	0	0	0	0	0	1	0
Escherichia_coli_IAI1_strain=IAI1	0	0	0	0	0	1	0
Escherichia_coli_IAI39_strain=IAI39	0	0	0	0	0	1	0
Escherichia_coli_IHE3034_strain=IHE3034	0	0	0	0	0	1	0
Escherichia_coli_JJ1886_strain=JJ1886	0	0	0	0	0	1	0
Escherichia_coli_JJ1887_strain=JJ1887	0	0	0	0	0	1	0
Escherichia_coli_K-12_strain=C3026	0	0	0	0	0	1	0
Escherichia_coli_K-12_strain=DHB4	0	0	0	0	0	1	0
Escherichia_coli_K-12_strain=ER3413	0	0	0	0	0	1	0
Escherichia_coli_K-12_strain=ER3435	0	0	0	0	0	1	0
Escherichia_coli_K-12_strain=ER3440	0	0	0	0	0	1	0
Escherichia_coli_K-12_strain=ER3445	0	0	0	0	0	1	0
Escherichia_coli_K-12_strain=ER3446	0	0	0	0	0	1	0
Escherichia_coli_K-12_strain=ER3454	0	0	0	0	0	1	0
Escherichia_coli_K-12_strain=ER3466	0	0	0	0	0	1	0
Escherichia_coli_K-12_strain=ER3475	0	0	0	0	0	1	0
Escherichia_coli_K-12_strain=ER3476	0	0	0	0	0	1	0
Escherichia_coli_K-12_strain=K-12_substr._AG100	0	0	0	0	0	1	0
Escherichia_coli_K-12_strain=K-12_substr._GM4792	0	0	0	0	0	1	0
Escherichia_coli_KLY_strain=KLY	0	0	0	0	0	1	0
Escherichia_coli_KO11FL_strain=KO11	0	0	0	0	0	1	0
Escherichia_coli_KO11FL_strain=KO11FL	0	0	0	0	0	1	0
Escherichia_coli_LF82_strain=LF82	0	0	0	0	0	1	0
Escherichia_coli_LY180_strain=LY180	0	0	0	0	0	1	0
Escherichia_coli_MS_107-1	0	0	0	0	0	1	0
Escherichia_coli_MS_110-3	0	0	0	0	0	1	0
Escherichia_coli_MS_115-1	0	0	0	0	0	1	0
Escherichia_coli_MS_116-1	0	0	0	0	0	1	0
Escherichia_coli_MS_117-3	0	0	0	0	0	1	0
Escherichia_coli_MS_119-7	0	0	0	0	0	1	0
Escherichia_coli_MS_124-1	0	0	0	0	0	1	0
Escherichia_coli_MS_145-7	0	0	0	0	0	1	0
Escherichia_coli_MS_146-1	0	0	0	0	0	1	0
Escherichia_coli_MS_153-1	0	0	0	0	0	1	0
Escherichia_coli_MS_16-3	0	0	0	0	0	1	0
Escherichia_coli_MS_175-1	0	0	0	0	0	1	0
Escherichia_coli_MS_182-1	0	0	0	0	0	1	0
Escherichia_coli_MS_185-1	0	0	0	0	0	1	0
Escherichia_coli_MS_187-1	0	0	0	0	0	1	0
Escherichia_coli_MS_196-1	0	0	0	0	0	1	0
Escherichia_coli_MS_198-1	0	0	0	0	0	1	0
Escherichia_coli_MS_200-1	0	0	0	0	0	1	0
Escherichia_coli_MS_21-1	0	0	0	0	0	1	0
Escherichia_coli_MS_45-1	0	0	0	0	0	1	0
Escherichia_coli_MS_57-2	0	0	0	0	0	1	0
Escherichia_coli_MS_60-1	0	0	0	0	0	1	0
Escherichia_coli_MS_69-1	0	0	0	0	0	1	0
Escherichia_coli_MS_78-1	0	0	0	0	0	1	0
Escherichia_coli_MS_79-10	0	0	0	0	0	1	0
Escherichia_coli_MS_84-1	0	0	0	0	0	1	0
Escherichia_coli_MS_85-1	0	0	0	0	0	1	0
Escherichia_coli_Nissle_1917_strain=Nissle_1917	0	0	0	0	0	1	0
Escherichia_coli_NU14_strain=NU14	0	0	0	0	0	1	0
Escherichia_coli_O103:H2_str._12009_strain=12009	0	0	0	0	0	1	0
Escherichia_coli_O104:H4_str._2009EL-2050_strain=2009EL-2050	0	0	0	0	0	1	0
Escherichia_coli_O104:H4_str._2009EL-2071_strain=2009EL-2071	0	0	0	0	0	1	0
Escherichia_coli_O104:H4_str._2011C-3493_strain=2011C-3493	0	0	0	0	0	1	0
Escherichia_coli_O104:H4_strain=FDAARGOS_348	0	0	0	0	0	1	0
Escherichia_coli_O104:H4_str._C227-11_strain=C227-11	0	0	0	0	0	1	0
Escherichia_coli_O111:H-_str._11128_strain=11128	0	0	0	0	0	1	0
Escherichia_coli_O127:H6_str._E2348_69_strain=E2348_69	0	0	0	0	0	1	0
Escherichia_coli_O139:H28_str._E24377A_strain=E24377A	0	0	0	0	0	1	0
Escherichia_coli_O145:H28_str._RM12581_strain=RM12581	0	0	0	0	0	1	0
Escherichia_coli_O145:H28_str._RM12761_strain=RM12761	0	0	0	0	0	1	0
Escherichia_coli_O145:H28_str._RM13514_strain=RM13514	0	0	0	0	0	1	0
Escherichia_coli_O145:H28_str._RM13516_strain=RM13516	0	0	0	0	0	1	0
Escherichia_coli_O157:H16_strain=Santai	0	0	0	0	0	1	0
Escherichia_coli_O157:H7_strain=1130	0	0	0	0	0	1	0
Escherichia_coli_O157:H7_strain=2149	0	0	0	0	0	1	0
Escherichia_coli_O157:H7_strain=2159	0	0	0	0	0	1	0
Escherichia_coli_O157:H7_strain=3384	0	0	0	0	0	1	0
Escherichia_coli_O157:H7_strain=4276	0	0	0	0	0	1	0
Escherichia_coli_O157:H7_strain=8368	0	0	0	0	0	1	0
Escherichia_coli_O157:H7_strain=9234	0	0	0	0	0	1	0
Escherichia_coli_O157:H7_strain=FRIK2069	0	0	0	0	0	1	0
Escherichia_coli_O157:H7_strain=FRIK2455	0	0	0	0	0	1	0
Escherichia_coli_O157:H7_strain=FRIK2533	0	0	0	0	0	1	0
Escherichia_coli_O157:H7_strain=FRIK944	0	0	0	0	0	1	0
Escherichia_coli_O157:H7_strain=JEONG-1266	0	0	0	0	0	1	0
Escherichia_coli_O157:H7_strain=WS4202_laboratory_strain	0	0	0	0	0	1	0
Escherichia_coli_O157:H7_str._EC4115_strain=EC4115	0	0	0	0	0	1	0
Escherichia_coli_O157:H7_str._EDL933_strain=EDL933	0	0	0	0	0	1	0
Escherichia_coli_O157:H7_str._Sakai_strain=Sakai_substr._RIMD_0509952	0	0	0	0	0	1	0
Escherichia_coli_O157:H7_str._SS17_strain=SS17	0	0	0	0	0	1	0
Escherichia_coli_O157:H7_str._SS52_strain=SS52	0	0	0	0	0	1	0
Escherichia_coli_O157:H7_str._TW14359_strain=TW14359	0	0	0	0	0	1	0
Escherichia_coli_O157_strain=180-PT54	0	0	0	0	0	1	0
Escherichia_coli_O157_strain=644-PT8	0	0	0	0	0	1	0
Escherichia_coli_O157_strain=FDAARGOS_293	0	0	0	0	0	1	0
Escherichia_coli_O25b:H4-ST131_strain=EC958	0	0	0	0	0	1	0
Escherichia_coli_O25b:H4_strain=O25b:H4	0	0	0	0	0	1	0
Escherichia_coli_O26:H11_str._11368_strain=11368	0	0	0	0	0	1	0
Escherichia_coli_O55:H7_str._CB9615_strain=CB9615	0	0	0	0	0	1	0
Escherichia_coli_O55:H7_str._RM12579_strain=RM12579	0	0	0	0	0	1	0
Escherichia_coli_O6:H16_strain=2011EL-1370-2	0	0	0	0	0	1	0
Escherichia_coli_O7:K1_str._CE10_strain=CE10	0	0	0	0	0	1	0
Escherichia_coli_O83:H1_str._NRG_857C_strain=NRG_857C	0	0	0	0	0	1	0
Escherichia_coli_P12b_strain=P12b	0	0	0	0	0	1	0
Escherichia_coli_PCN033_strain=PCN033	0	0	0	0	0	1	0
Escherichia_coli_PCN061_strain=PCN061	0	0	0	0	0	1	0
Escherichia_coli_RS218_strain=RS218	0	0	0	0	0	1	0
Escherichia_coli_S88_strain=S88	0	0	0	0	0	1	0
Escherichia_coli_SE11	0	0	0	0	0	1	0
Escherichia_coli_SE11_strain=SE11	0	0	0	0	0	1	0
Escherichia_coli_SE15	0	0	0	0	0	1	0
Escherichia_coli_SE15_strain=SE15	0	0	0	0	0	1	0
Escherichia_coli_SMS-3-5_strain=SMS-3-5	0	0	0	0	0	1	0
Escherichia_coli_strain=06-00048_CFSAN004178	0	0	0	0	0	1	0
Escherichia_coli_strain=08-00022	0	0	0	0	0	1	0
Escherichia_coli_strain=09-00049	0	0	0	0	0	1	0
Escherichia_coli_strain=1031	0	0	0	0	0	1	0
Escherichia_coli_strain=10671	0	0	0	0	0	1	0
Escherichia_coli_strain=13E0725	0	0	0	0	0	1	0
Escherichia_coli_strain=13E0767	0	0	0	0	0	1	0
Escherichia_coli_strain=13E0780	0	0	0	0	0	1	0
Escherichia_coli_strain=155	0	0	0	0	0	1	0
Escherichia_coli_strain=2009C-3133	0	0	0	0	0	1	0
Escherichia_coli_strain=2011C-3911	0	0	0	0	0	1	0
Escherichia_coli_strain=2012C-4227	0	0	0	0	0	1	0
Escherichia_coli_strain=2013C-4465	0	0	0	0	0	1	0
Escherichia_coli_strain=207	0	0	0	0	0	1	0
Escherichia_coli_strain=210205630_210205630	0	0	0	0	0	1	0
Escherichia_coli_strain=210221272	0	0	0	0	0	1	0
Escherichia_coli_strain=272	0	0	0	0	0	1	0
Escherichia_coli_strain=28RC1	0	0	0	0	0	1	0
Escherichia_coli_strain=319	0	0	0	0	0	1	0
Escherichia_coli_strain=350	0	0	0	0	0	1	0
Escherichia_coli_strain=472	0	0	0	0	0	1	0
Escherichia_coli_strain=5CRE51	0	0	0	0	0	1	0
Escherichia_coli_strain=6409	0	0	0	0	0	1	0
Escherichia_coli_strain=7784	0	0	0	0	0	1	0
Escherichia_coli_strain=81009	0	0	0	0	0	1	0
Escherichia_coli_strain=9	0	0	0	0	0	1	0
Escherichia_coli_strain=9000	0	0	0	0	0	1	0
Escherichia_coli_strain=94-3024	0	0	0	0	0	1	0
Escherichia_coli_strain=95JB1	0	0	0	0	0	1	0
Escherichia_coli_strain=95NR1	0	0	0	0	0	1	0
Escherichia_coli_strain=ABWA45	0	0	0	0	0	1	0
Escherichia_coli_strain=ACN002	0	0	0	0	0	1	0
Escherichia_coli_strain=AR_0055	0	0	0	0	0	1	0
Escherichia_coli_strain=AR_0058	0	0	0	0	0	1	0
Escherichia_coli_strain=AR_0061	0	0	0	0	0	1	0
Escherichia_coli_strain=AR_0069	0	0	0	0	0	1	0
Escherichia_coli_strain=AR_0104	0	0	0	0	0	1	0
Escherichia_coli_strain=AR_0114	0	0	0	0	0	1	0
Escherichia_coli_strain=AR_0118	0	0	0	0	0	1	0
Escherichia_coli_strain=AR_0128	0	0	0	0	0	1	0
Escherichia_coli_strain=AR_0137	0	0	0	0	0	1	0
Escherichia_coli_strain=AR_0149	0	0	0	0	0	1	0
Escherichia_coli_strain=AR_0150	0	0	0	0	0	1	0
Escherichia_coli_strain=AR_0151	0	0	0	0	0	1	0
Escherichia_coli_strain=AR_0162	0	0	0	0	0	1	0
Escherichia_coli_strain=BL21_TaKaRa	0	0	0	0	0	1	0
Escherichia_coli_strain=BLK16	0	0	0	0	0	1	0
Escherichia_coli_strain=BLK9	0	0	0	0	0	1	0
Escherichia_coli_strain=BLRDE3	0	0	0	0	0	1	0
Escherichia_coli_strain=C1	0	0	0	0	0	1	0
Escherichia_coli_strain=C10	0	0	0	0	0	1	0
Escherichia_coli_strain=C11	0	0	0	0	0	1	0
Escherichia_coli_strain=C2	0	0	0	0	0	1	0
Escherichia_coli_strain=C3	0	0	0	0	0	1	0
Escherichia_coli_strain=C4	0	0	0	0	0	1	0
Escherichia_coli_strain=C41DE3	0	0	0	0	0	1	0
Escherichia_coli_strain=C43DE3	0	0	0	0	0	1	0
Escherichia_coli_strain=C5	0	0	0	0	0	1	0
Escherichia_coli_strain=C7	0	0	0	0	0	1	0
Escherichia_coli_strain=C8	0	0	0	0	0	1	0
Escherichia_coli_strain=C9	0	0	0	0	0	1	0
Escherichia_coli_strain=CD306	0	0	0	0	0	1	0
Escherichia_coli_strain=CDC#03-98	0	0	0	0	0	1	0
Escherichia_coli_strain=CFSAN004176	0	0	0	0	0	1	0
Escherichia_coli_strain=CFSAN004177	0	0	0	0	0	1	0
Escherichia_coli_strain=CFSAN029787	0	0	0	0	0	1	0
Escherichia_coli_strain=CFSAN051542	0	0	0	0	0	1	0
Escherichia_coli_strain=CFSAN061770	0	0	0	0	0	1	0
Escherichia_coli_strain=CI5	0	0	0	0	0	1	0
Escherichia_coli_strain=CQSW20	0	0	0	0	0	1	0
Escherichia_coli_strain=D1	0	0	0	0	0	1	0
Escherichia_coli_strain=D10	0	0	0	0	0	1	0
Escherichia_coli_strain=D2	0	0	0	0	0	1	0
Escherichia_coli_strain=D3	0	0	0	0	0	1	0
Escherichia_coli_strain=D4	0	0	0	0	0	1	0
Escherichia_coli_strain=D5	0	0	0	0	0	1	0
Escherichia_coli_strain=D6	0	0	0	0	0	1	0
Escherichia_coli_strain=D7	0	0	0	0	0	1	0
Escherichia_coli_strain=D8	0	0	0	0	0	1	0
Escherichia_coli_strain=D9	0	0	0	0	0	1	0
Escherichia_coli_strain=DH1Ec095	0	0	0	0	0	1	0
Escherichia_coli_strain=DH1Ec104	0	0	0	0	0	1	0
Escherichia_coli_strain=DH1Ec169	0	0	0	0	0	1	0
Escherichia_coli_strain=DSM_103246	0	0	0	0	0	1	0
Escherichia_coli_strain=E62	0	0	0	0	0	1	0
Escherichia_coli_strain=EC1515	0	0	0	0	0	1	0
Escherichia_coli_strain=EC590	0	0	0	0	0	1	0
Escherichia_coli_strain=EC974	0	0	0	0	0	1	0
Escherichia_coli_strain=Eco889	0	0	0	0	0	1	0
Escherichia_coli_strain=Ecol_224	0	0	0	0	0	1	0
Escherichia_coli_strain=Ecol_244	0	0	0	0	0	1	0
Escherichia_coli_strain=Ecol_276	0	0	0	0	0	1	0
Escherichia_coli_strain=Ecol_316	0	0	0	0	0	1	0
Escherichia_coli_strain=Ecol_422	0	0	0	0	0	1	0
Escherichia_coli_strain=Ecol_448	0	0	0	0	0	1	0
Escherichia_coli_strain=Ecol_517	0	0	0	0	0	1	0
Escherichia_coli_strain=Ecol_542	0	0	0	0	0	1	0
Escherichia_coli_strain=Ecol_545	0	0	0	0	0	1	0
Escherichia_coli_strain=Ecol_656	0	0	0	0	0	1	0
Escherichia_coli_strain=Ecol_732	0	0	0	0	0	1	0
Escherichia_coli_strain=Ecol_743	0	0	0	0	0	1	0
Escherichia_coli_strain=Ecol_745	0	0	0	0	0	1	0
Escherichia_coli_strain=Ecol_867	0	0	0	0	0	1	0
Escherichia_coli_strain=Ecol_881	0	0	0	0	0	1	0
Escherichia_coli_strain=Ecol_AZ146	0	0	0	0	0	1	0
Escherichia_coli_strain=Ecol_AZ147	0	0	0	0	0	1	0
Escherichia_coli_strain=Ecol_AZ153	0	0	0	0	0	1	0
Escherichia_coli_strain=Ecol_AZ155	0	0	0	0	0	1	0
Escherichia_coli_strain=Ecol_AZ159	0	0	0	0	0	1	0
Escherichia_coli_strain=Ecol_AZ161	0	0	0	0	0	1	0
Escherichia_coli_strain=Ecol_AZ162	0	0	0	0	0	1	0
Escherichia_coli_strain=ECONIH1	0	0	0	0	0	1	0
Escherichia_coli_strain=ECONIH2	0	0	0	0	0	1	0
Escherichia_coli_strain=ER1821R	0	0	0	0	0	1	0
Escherichia_coli_strain=FMU073332	0	0	0	0	0	1	0
Escherichia_coli_strain=FORC_028	0	0	0	0	0	1	0
Escherichia_coli_strain=FORC_029	0	0	0	0	0	1	0
Escherichia_coli_strain=FORC_031	0	0	0	0	0	1	0
Escherichia_coli_strain=FORC_041	0	0	0	0	0	1	0
Escherichia_coli_strain=FORC_043	0	0	0	0	0	1	0
Escherichia_coli_strain=FORC_044	0	0	0	0	0	1	0
Escherichia_coli_strain=G749	0	0	0	0	0	1	0
Escherichia_coli_strain=GB089	0	0	0	0	0	1	0
Escherichia_coli_strain=H1	0	0	0	0	0	1	0
Escherichia_coli_strain=H10	0	0	0	0	0	1	0
Escherichia_coli_strain=H105	0	0	0	0	0	1	0
Escherichia_coli_strain=H14	0	0	0	0	0	1	0
Escherichia_coli_strain=H15	0	0	0	0	0	1	0
Escherichia_coli_strain=H1827_12	0	0	0	0	0	1	0
Escherichia_coli_strain=H2	0	0	0	0	0	1	0
Escherichia_coli_strain=H3	0	0	0	0	0	1	0
Escherichia_coli_strain=H5	0	0	0	0	0	1	0
Escherichia_coli_strain=H6	0	0	0	0	0	1	0
Escherichia_coli_strain=H7	0	0	0	0	0	1	0
Escherichia_coli_strain=H8	0	0	0	0	0	1	0
Escherichia_coli_strain=HB-Coli0	0	0	0	0	0	1	0
Escherichia_coli_strain=HST04	0	0	0	0	0	1	0
Escherichia_coli_strain=HUSEC2011	0	0	0	0	0	1	0
Escherichia_coli_strain=JJ1897	0	0	0	0	0	1	0
Escherichia_coli_strain=JJ2434	0	0	0	0	0	1	0
Escherichia_coli_strain=K-12_NEB_5-alpha	0	0	0	0	0	1	0
Escherichia_coli_strain=K-12_substr._HMS174	0	0	0	0	0	1	0
Escherichia_coli_strain=K-12_substr._MG1655_TMP32XR1	0	0	0	0	0	1	0
Escherichia_coli_strain=K-12_substr._MG1655_TMP32XR2	0	0	0	0	0	1	0
Escherichia_coli_strain=K-12_substr._RV308	0	0	0	0	0	1	0
Escherichia_coli_strain=K-15KW01	0	0	0	0	0	1	0
Escherichia_coli_strain=M1	0	0	0	0	0	1	0
Escherichia_coli_strain=M10	0	0	0	0	0	1	0
Escherichia_coli_strain=M11	0	0	0	0	0	1	0
Escherichia_coli_strain=M15	0	0	0	0	0	1	0
Escherichia_coli_strain=M160133	0	0	0	0	0	1	0
Escherichia_coli_strain=M18	0	0	0	0	0	1	0
Escherichia_coli_strain=M19	0	0	0	0	0	1	0
Escherichia_coli_strain=M3	0	0	0	0	0	1	0
Escherichia_coli_strain=M6	0	0	0	0	0	1	0
Escherichia_coli_strain=M8	0	0	0	0	0	1	0
Escherichia_coli_strain=M9	0	0	0	0	0	1	0
Escherichia_coli_strain=MDR_56	0	0	0	0	0	1	0
Escherichia_coli_strain=MEM	0	0	0	0	0	1	0
Escherichia_coli_strain=MGY	0	0	0	0	0	1	0
Escherichia_coli_strain=MNCRE44	0	0	0	0	0	1	0
Escherichia_coli_strain=MRE600	0	0	0	0	0	1	0
Escherichia_coli_strain=MRSN346355	0	0	0	0	0	1	0
Escherichia_coli_strain=MRSN346595	0	0	0	0	0	1	0
Escherichia_coli_strain=MRSN346638	0	0	0	0	0	1	0
Escherichia_coli_strain=MRSN346647	0	0	0	0	0	1	0
Escherichia_coli_strain=MRSN352231	0	0	0	0	0	1	0
Escherichia_coli_strain=MS6198	0	0	0	0	0	1	0
Escherichia_coli_strain=MVAST0167	0	0	0	0	0	1	0
Escherichia_coli_strain=NADC_5570_86-24_6564	0	0	0	0	0	1	0
Escherichia_coli_strain=NADC_5570_86-24_6565	0	0	0	0	0	1	0
Escherichia_coli_strain=NCM3722_K-12	0	0	0	0	0	1	0
Escherichia_coli_strain=NCTC122	0	0	0	0	0	1	0
Escherichia_coli_strain=NCTC86	0	0	0	0	0	1	0
Escherichia_coli_strain=NGF1	0	0	0	0	0	1	0
Escherichia_coli_strain=NMEC_O18	0	0	0	0	0	1	0
Escherichia_coli_strain=O177:H21	0	0	0	0	0	1	0
Escherichia_coli_strain=PA20	0	0	0	0	0	1	0
Escherichia_coli_strain=PA45B	0	0	0	0	0	1	0
Escherichia_coli_strain=PAR	0	0	0	0	0	1	0
Escherichia_coli_strain=PSUO103	0	0	0	0	0	1	0
Escherichia_coli_strain=PSUO2	0	0	0	0	0	1	0
Escherichia_coli_strain=PSUO78	0	0	0	0	0	1	0
Escherichia_coli_strain=RM9387	0	0	0	0	0	1	0
Escherichia_coli_strain=RR1	0	0	0	0	0	1	0
Escherichia_coli_strain=S1	0	0	0	0	0	1	0
Escherichia_coli_strain=S10	0	0	0	0	0	1	0
Escherichia_coli_strain=S21	0	0	0	0	0	1	0
Escherichia_coli_strain=S3	0	0	0	0	0	1	0
Escherichia_coli_strain=S30	0	0	0	0	0	1	0
Escherichia_coli_strain=S40	0	0	0	0	0	1	0
Escherichia_coli_strain=S42	0	0	0	0	0	1	0
Escherichia_coli_strain=S43	0	0	0	0	0	1	0
Escherichia_coli_strain=S50	0	0	0	0	0	1	0
Escherichia_coli_strain=S51	0	0	0	0	0	1	0
Escherichia_coli_strain=S56	0	0	0	0	0	1	0
Escherichia_coli_strain=SaT040	0	0	0	0	0	1	0
Escherichia_coli_strain=SEC470	0	0	0	0	0	1	0
Escherichia_coli_strain=SF-088	0	0	0	0	0	1	0
Escherichia_coli_strain=SF-166	0	0	0	0	0	1	0
Escherichia_coli_strain=SF-173	0	0	0	0	0	1	0
Escherichia_coli_strain=SF-468	0	0	0	0	0	1	0
Escherichia_coli_strain=SLK172	0	0	0	0	0	1	0
Escherichia_coli_strain=SQ110	0	0	0	0	0	1	0
Escherichia_coli_strain=SQ171	0	0	0	0	0	1	0
Escherichia_coli_strain=SQ2203	0	0	0	0	0	1	0
Escherichia_coli_strain=SQ37	0	0	0	0	0	1	0
Escherichia_coli_strain=SQ88	0	0	0	0	0	1	0
Escherichia_coli_strain=SRCC_1675	0	0	0	0	0	1	0
Escherichia_coli_strain=ST2747	0	0	0	0	0	1	0
Escherichia_coli_strain=ST540	0	0	0	0	0	1	0
Escherichia_coli_strain=ST648	0	0	0	0	0	1	0
Escherichia_coli_strain=strain_Z247	0	0	0	0	0	1	0
Escherichia_coli_strain=tolC-	0	0	0	0	0	1	0
Escherichia_coli_strain=uk_P46212	0	0	0	0	0	1	0
Escherichia_coli_strain=UPEC_26-1	0	0	0	0	0	1	0
Escherichia_coli_strain=USML2	0	0	0	0	0	1	0
Escherichia_coli_strain=WAT	0	0	0	0	0	1	0
Escherichia_coli_strain=WCHEC1613	0	0	0	0	0	1	0
Escherichia_coli_strain=Y5	0	0	0	0	0	1	0
Escherichia_coli_strain=YD786	0	0	0	0	0	1	0
Escherichia_coli_strain=Z1002	0	0	0	0	0	1	0
Escherichia_coli_strain=ZH063	0	0	0	0	0	1	0
Escherichia_coli_strain=ZH193	0	0	0	0	0	1	0
Escherichia_coli_str._'clone_D_i14'_strain=clone_D_i14	0	0	0	0	0	1	0
Escherichia_coli_str._'clone_D_i2'_strain=clone_D_i2	0	0	0	0	0	1	0
Escherichia_coli_str._K-12_substr._DH10B_strain=K-12_substr._DH10B	0	0	0	0	0	1	0
Escherichia_coli_str._K-12_substr._MC4100_strain=K-12_substr._MC4100	0	0	0	0	0	1	0
Escherichia_coli_str._K-12_substr._MDS42_strain=K-12_substr._MDS42	0	0	0	0	0	1	0
Escherichia_coli_str._K-12_substr._MG1655_strain=JW5437-1_substr._MG1655	0	0	0	0	0	1	0
Escherichia_coli_str._K-12_substr._MG1655_strain=K-12_substr._MG1655	0	0	0	0	0	1	0
Escherichia_coli_str._K-12_substr._W3110_strain=K-12_substr._W3110	0	0	0	0	0	1	0
Escherichia_coli_str._Sanji_strain=Sanji	0	0	0	0	0	1	0
Escherichia_coli_UM146_strain=UM146	0	0	0	0	0	1	0
Escherichia_coli_UMNK88_strain=UMNK88	0	0	0	0	0	1	0
Escherichia_coli_UTI89_strain=UTI89	0	0	0	0	0	1	0
Escherichia_coli_VR50_strain=VR50	0	0	0	0	0	1	0
Escherichia_coli_W_strain=W	0	0	0	0	0	1	0
Escherichia_coli_Xuzhou21_strain=Xuzhou21	0	0	0	0	0	1	0
Escherichia_fergusonii_ATCC_35469	0	0	0	0	0	1	0
Escherichia_sp._1_1_43	0	0	0	0	0	1	0
Escherichia_sp._3_2_53FAA	0	0	0	0	0	1	0
Escherichia_sp._4_1_40B	0	0	0	0	0	1	0
Exiguobacterium_antarcticum_B7_strain=Eab7	1	0	0	0	0	0	0
Exiguobacterium_sibiricum_255-15_strain=255-15	1	0	0	0	0	0	0
Exiguobacterium_sp._AT1b_strain=AT1b	1	0	0	0	0	0	0
Exiguobacterium_sp._MH3_strain=MH3	1	0	0	0	0	0	0
Exiguobacterium_sp._U13-1_strain=U13-1	1	0	0	0	0	0	0
Fictibacillus_arsenicus_strain=G25-54	1	1	0	0	0	0	0
Fictibacillus_phosphorivorans_strain=G25-29	1	1	0	0	0	0	0
Flammeovirgaceae_bacterium_311_strain=311	1	1	0	0	0	0	0
Flavobacteriaceae_bacterium_3519-10_strain=3519-10	0	0	0	0	0	1	0
Flavobacterium_branchiophilum_FL-15_strain=FL-15	1	1	0	0	0	0	0
Flavobacterium_columnare_ATCC_49512_strain=ATCC_49512	1	1	0	0	0	0	0
Flavobacterium_columnare_strain=94-081	1	1	0	0	0	0	0
Flavobacterium_columnare_strain=C#2	1	1	0	0	0	0	0
Flavobacterium_columnare_strain=Pf1	1	1	0	0	0	0	0
Flavobacterium_columnare_strain=TC_1691	1	1	0	0	0	0	0
Flavobacterium_communis_strain=PK15	0	1	0	0	0	0	0
Flavobacterium_indicum_GPTSA100-9_=_DSM_17447_strain=GPTSA100-9	1	1	0	0	0	0	0
Flavobacterium_johnsoniae_UW101_strain=UW101;_ATCC_17061	1	1	0	0	0	0	0
Flavobacterium_psychrophilum_FPG101_strain=FPG101	1	1	0	0	0	0	0
Flavobacterium_psychrophilum_FPG3_strain=FPG3	1	1	0	0	0	0	0
Flavobacterium_psychrophilum_JIP02_86_strain=JIP02_86	1	1	0	0	0	0	0
Flavobacterium_psychrophilum_strain=950106-1_1	1	1	0	0	0	0	0
Flavobacterium_psychrophilum_strain=CSF259-93	1	1	0	0	0	0	0
Flavobacterium_psychrophilum_strain=V3-5	1	1	0	0	0	0	0
Flavobacterium_psychrophilum_strain=V4-24	1	1	0	0	0	0	0
Flavobacterium_psychrophilum_strain=v4-33	1	1	0	0	0	0	0
Flavobacterium_psychrophilum_strain=Z1	1	1	0	0	0	0	0
Flavobacterium_psychrophilum_strain=Z2	1	1	0	0	0	0	0
Fluviicola_sp._RIFCSPHIGHO2_02_FULL_43_260	1	1	0	0	0	0	0
Fluviicola_taffensis_DSM_16823_strain=DSM_16823	1	1	0	0	0	0	0
Formosa_sp._Hel1_33_131_strain=Hel1_33_131	1	1	0	0	0	0	0
Formosa_sp._Hel3_A1_48_strain=Hel3_A1_48	1	1	0	0	0	0	0
Francisella_tularensis_subsp._holarctica_F92_strain=F92	0	0	0	1	0	0	0
Francisella_tularensis_subsp._holarctica_FSC200_strain=FSC200	0	0	0	1	0	0	0
Francisella_tularensis_subsp._holarctica_FTNF002-00_strain=FTNF002-00	0	0	0	1	0	0	0
Francisella_tularensis_subsp._holarctica_LVS_strain=LVS	0	0	0	1	0	0	0
Francisella_tularensis_subsp._holarctica_OSU18_strain=OSU18	0	0	0	1	0	0	0
Francisella_tularensis_subsp._holarctica_PHIT-FT049_strain=PHIT-FT049	0	0	0	1	0	0	0
Francisella_tularensis_subsp._holarctica_strain=425	0	0	0	1	0	0	0
Francisella_tularensis_subsp._holarctica_strain=FTT_1	0	0	0	1	0	0	0
Francisella_tularensis_subsp._holarctica_strain=VT68	0	0	0	1	0	0	0
Francisella_tularensis_subsp._mediasiatica_FSC147_strain=FSC147;_GIEM_543	0	0	0	1	0	0	0
Francisella_tularensis_subsp._novicida_D9876_strain=D9876	0	0	0	1	0	0	0
Francisella_tularensis_subsp._novicida_F6168_strain=F6168	0	0	0	1	0	0	0
Francisella_tularensis_subsp._novicida_PA10-7858_strain=PA10-7858	0	0	0	1	0	0	0
Francisella_tularensis_subsp._novicida_strain=AL97-2214	0	0	0	1	0	0	0
Francisella_tularensis_subsp._novicida_strain=AZ06-7470	0	0	0	1	0	0	0
Francisella_tularensis_subsp._novicida_strain=DPG_3A-IS	0	0	0	1	0	0	0
Francisella_tularensis_subsp._novicida_U112_strain=U112	0	0	0	1	0	0	0
Francisella_tularensis_subsp._tularensis_FSC198_strain=FSC_198	0	0	0	1	0	0	0
Francisella_tularensis_subsp._tularensis_MA00-2987_strain=MA00-2987	0	0	0	1	0	0	0
Francisella_tularensis_subsp._tularensis_NE061598_strain=NE061598	0	0	0	1	0	0	0
Francisella_tularensis_subsp._tularensis_SCHU_S4_strain=SCHU_S4	0	0	0	1	0	0	0
Francisella_tularensis_subsp._tularensis_SCHU_S4_strain=SHU-S4	0	0	0	1	0	0	0
Francisella_tularensis_subsp._tularensis_strain=NIH_B-38	0	0	0	1	0	0	0
Francisella_tularensis_subsp._tularensis_strain=NR-21734	0	0	0	1	0	0	0
Francisella_tularensis_subsp._tularensis_strain=NR-21736	0	0	0	1	0	0	0
Francisella_tularensis_subsp._tularensis_strain=NR-21737	0	0	0	1	0	0	0
Francisella_tularensis_subsp._tularensis_strain=WY96	0	0	0	1	0	0	0
Francisella_tularensis_subsp._tularensis_str._SCHU_S4_substr._NR-28534_strain=SCHU_S4_substr._NR-28534	0	0	0	1	0	0	0
Francisella_tularensis_subsp._tularensis_TI0902_strain=TI0902	0	0	0	1	0	0	0
Francisella_tularensis_subsp._tularensis_TIGB03_strain=TIGB03	0	0	0	1	0	0	0
Francisella_tularensis_subsp._tularensis_WY-00W4114_strain=WY-00W4114	0	0	0	1	0	0	0
Francisella_tularensis_subsp._tularensis_WY96-3418_strain=WY96-3418	0	0	0	1	0	0	0
Frankia_inefficax_strain=EuI1c	1	1	0	0	0	0	0
Frankia_symbiont_of_Datisca_glomerata_strain=4085684	1	0	0	0	0	0	0
Frateuria_aurantia_DSM_6220_strain=DSM_6220	0	1	0	0	0	0	0
Fusobacterium_gonidiaformans_3-1-5R	0	0	0	0	0	1	0
Fusobacterium_gonidiaformans_ATCC_25563	0	0	0	0	0	1	0
Fusobacterium_necrophorum_D12	0	0	0	0	0	1	0
Fusobacterium_necrophorum_subsp._funduliforme_1_1_36S	0	0	0	0	0	1	0
Fusobacterium_nucleatum_subsp._animalis_11_3_2	0	0	0	0	0	1	0
Fusobacterium_nucleatum_subsp._animalis_21_1A	0	0	0	0	0	1	0
Fusobacterium_nucleatum_subsp._animalis_3_1_33	0	0	0	0	0	1	0
Fusobacterium_nucleatum_subsp._animalis_4_8_strain=4_8	0	0	0	0	0	1	0
Fusobacterium_nucleatum_subsp._animalis_7_1	0	0	0	0	0	1	0
Fusobacterium_nucleatum_subsp._animalis_7_1_strain=7_1	0	0	0	0	0	1	0
Fusobacterium_nucleatum_subsp._animalis_ATCC_51191	0	0	1	0	0	1	0
Fusobacterium_nucleatum_subsp._animalis_D11	0	0	0	0	0	1	0
Fusobacterium_nucleatum_subsp._animalis_strain=ChDC_F332	0	0	0	0	0	1	0
Fusobacterium_nucleatum_subsp._animalis_strain=KCOM_1279	0	0	0	0	0	1	0
Fusobacterium_nucleatum_subsp._animalis_strain=KCOM_1325	0	0	0	0	0	1	0
Fusobacterium_nucleatum_subsp._nucleatum_ATCC_25586_strain=ATCC_25586	0	0	0	0	0	1	0
Fusobacterium_nucleatum_subsp._nucleatum_ChDC_F316_strain=KCOM_1322	0	0	0	0	0	1	0
Fusobacterium_nucleatum_subsp._nucleatum_strain=ChDC_F317	0	0	0	0	0	1	0
Fusobacterium_nucleatum_subsp._nucleatum_strain=KCOM_1250	0	0	0	0	0	1	0
Fusobacterium_nucleatum_subsp._polymorphum_strain=ChDC_F306	0	0	0	0	0	1	0
Fusobacterium_nucleatum_subsp._polymorphum_strain=KCOM_1275	0	0	0	0	0	1	0
Fusobacterium_nucleatum_subsp._polymorphum_strain=NCTC10562	0	0	0	0	0	1	0
Fusobacterium_nucleatum_subsp._vincentii_3_1_27_strain=3_1_27	0	0	0	0	0	1	0
Fusobacterium_nucleatum_subsp._vincentii_3_1_36A2_strain=3_1_36A2	0	0	0	0	0	1	0
Fusobacterium_nucleatum_subsp._vincentii_4_1_13	0	0	0	0	0	1	0
Fusobacterium_nucleatum_subsp._vincentii_ChDC_F8_strain=KCOM_1231	0	0	0	0	0	1	0
Fusobacterium_periodonticum_1_1_41FAA	0	0	0	0	0	1	0
Fusobacterium_periodonticum_2_1_31	0	0	0	0	0	1	0
Fusobacterium_ulcerans_12-1B	0	0	0	0	0	1	0
Fusobacterium_ulcerans_ATCC_49185	0	0	0	0	0	1	0
Fusobacterium_varium_ATCC_27725	0	0	0	0	0	1	0
Gemmata_sp._SH-PL17_strain=SH-PL17	1	1	0	0	0	0	0
Gemmatirosa_kalamazoonesis_strain=KBS708	1	0	0	0	0	0	0
Geobacillus_thermodenitrificans_NG80-2_strain=NG80-2	1	1	0	0	0	0	0
Geobacillus_thermodenitrificans_strain=KCTC3902	1	0	0	0	0	0	0
Geobacillus_thermodenitrificans_strain=T12	1	0	0	0	0	0	0
Geodermatophilus_obscurus_DSM_43160_strain=DSM_43160	1	0	0	0	0	0	0
Glaciecola_sp._4H-3-7�5_strain=4H-3-7�5	1	0	0	0	0	0	0
Gloeobacter_violaceus_PCC_7421_strain=PCC_7421	1	0	0	0	0	0	0
Glutamicibacter_arilaitensis_strain=KLBMP5180	1	0	0	0	0	0	0
Gramella_flava_JLT2011_strain=JLT2011	1	1	0	0	0	0	0
Gramella_forsetii_KT0803_strain=KT0803	1	1	0	0	0	0	0
Gramella_sp._LPB0144_strain=LPB0144	1	1	0	0	0	0	0
Granulicella_mallensis_MP5ACTX8_strain=MP5ACTX8	0	0	0	0	0	0	1
Granulosicoccus_antarcticus_IMCC3135_strain=IMCC3135	1	1	0	0	0	0	0
Grimontia_hollisae_strain=ATCC_33564	0	1	0	0	0	0	0
Gynuella_sunshinyii_YC6258_strain=YC6258	0	0	0	0	0	1	0
Haemophilus_influenzae_10810_strain=10810	0	0	0	0	0	1	0
Haemophilus_influenzae_86-028NP_strain=86-028NP	0	0	0	0	0	1	0
Haemophilus_pittmaniae_strain=NCTC13334	0	1	0	0	0	0	0
Haemophilus_somnus_129PT_strain=129PT	0	0	0	0	0	1	0
Haemophilus_somnus_2336_strain=2336	0	0	0	0	0	1	0
Hafnia_alvei_ATCC_51873	0	0	0	1	0	0	0
Hahella_chejuensis_KCTC_2396_strain=KCTC_2396	0	1	0	0	0	0	0
Haliscomenobacter_hydrossis_DSM_1100_strain=DSM_1100	0	0	0	0	0	1	1
Halobacillus_halophilus_DSM_2266_strain=type_strain:_DSM_2266	1	1	0	0	0	0	0
Halobacillus_halophilus_strain=HL2HP6	1	1	0	0	0	0	0
Halobacillus_mangrovi_strain=KTB_131	1	0	0	0	0	0	0
Halomonas_campaniensis_strain=LS21	0	1	0	0	0	0	0
Halothermothrix_orenii_H_168_strain=H_168;_DSM_9562	0	0	0	0	0	1	0
Herbaspirillum_sp._meg3_strain=meg3	0	1	0	0	0	0	0
Herpetosiphon_aurantiacus_DSM_785	1	0	0	0	0	0	0
Histophilus_somni_strain=USDA-ARS-USMARC-63250	0	0	0	0	0	1	0
Histophilus_somni_strain=USDA-ARS-USMARC-63255	0	0	0	0	0	1	0
Histophilus_somni_strain=USDA-ARS-USMARC-63368	0	0	0	0	0	1	0
Histophilus_somni_strain=USDA-ARS-USMARC-63369	0	0	0	0	0	1	0
Histophilus_somni_strain=USDA-ARS-USMARC-63370	0	0	0	0	0	1	0
Histophilus_somni_strain=USDA-ARS-USMARC-63373	0	0	0	0	0	1	0
Histophilus_somni_strain=USDA-ARS-USMARC-63374	0	0	0	0	0	1	0
Hoeflea_sp._IMCC20628_strain=IMCC20628	1	0	0	0	0	0	0
Holdemania_filiformis_DSM_12042	0	0	0	0	0	0	1
Hydrogenophaga_sp._LPB0072_strain=LPB0072	1	0	0	0	0	0	0
Hydrogenophaga_sp._PBC_strain=PBC	1	0	0	0	0	0	0
Hydrogenophaga_sp._RAC07_strain=RAC07	1	0	0	0	0	0	0
Hymenobacter_sedentarius_strain=DG5B	1	1	0	0	0	0	0
Hymenobacter_sp._APR13_strain=APR13	1	1	0	0	0	0	0
Hymenobacter_sp._DG25A_strain=DG25A	1	1	0	0	0	0	0
Hymenobacter_sp._DG25B_strain=DG25B	1	1	0	0	0	0	0
Hymenobacter_sp._PAMC_26554_strain=PAMC_26554	1	1	0	0	0	0	0
Hymenobacter_sp._PAMC_26628_strain=PAMC_26628	1	1	0	0	0	0	0
Hymenobacter_swuensis_DY53_strain=DY53	1	1	0	0	0	0	0
Hyphomonas_neptunium_ATCC_15444_strain=ATCC_15444	0	0	0	0	0	1	0
Ilumatobacter_coccineus_YM16-304_strain=YM16-304	0	0	0	0	0	0	1
Intestinibacter_bartlettii_DSM_16795	0	0	1	0	0	0	0
Intrasporangium_calvum_DSM_43043_strain=DSM_43043	0	0	0	0	0	1	0
Janthinobacterium_sp._1_2014MBL_MicDiv_strain=1_2014MBL_MicDiv	1	0	1	0	0	0	1
Janthinobacterium_sp._LM6_strain=LM6	1	0	0	0	0	0	0
Jeotgalibacillus_malaysiensis_strain=D5	1	0	0	0	0	0	0
Kangiella_geojedonensis_strain=YCS-5	1	1	0	0	0	0	0
Kangiella_koreensis_DSM_16069_strain=DSM_16069	1	1	0	0	0	0	0
Kangiella_sediminilitoris_strain=KCTC_23892	1	1	0	0	0	0	0
Kibdelosporangium_phytohabitans_strain=KLBMP1111	1	0	0	0	0	0	0
Kineococcus_radiotolerans_SRS30216_=_ATCC_BAA-149_strain=SRS30216	1	0	0	0	0	0	0
Kitasatospora_albolonga_strain=YIM_101047	1	0	0	0	0	0	0
Kitasatospora_aureofaciens_strain=DM-1	1	0	0	0	0	0	0
Kitasatospora_setae_KM-6054_strain=KM-6054	1	0	0	0	0	1	0
Klebsiella_aerogenes_EA1509E_strain=EA1509E	0	0	0	1	0	1	0
Klebsiella_aerogenes_KCTC_2190_strain=KCTC_2190	0	0	0	1	0	1	0
Klebsiella_aerogenes_strain=CAV1320	0	0	0	1	0	1	0
Klebsiella_aerogenes_strain=FDAARGOS_139	0	0	0	1	0	1	0
Klebsiella_aerogenes_strain=FDAARGOS_152	0	0	0	1	0	1	0
Klebsiella_aerogenes_strain=G7	0	0	0	1	0	1	0
Klebsiella_oxytoca_KONIH1_strain=KONIH1	0	0	0	0	0	1	0
Klebsiella_pneumoniae_11	0	1	0	1	0	0	0
Klebsiella_pneumoniae_23	0	1	0	1	0	0	0
Klebsiella_pneumoniae_30660_NJST258_1_strain=30660_NJST258_1	0	1	0	1	0	0	0
Klebsiella_pneumoniae_30684_NJST258_2_strain=30684_NJST258_2	0	1	0	1	0	0	0
Klebsiella_pneumoniae_342_strain=342	0	1	0	1	0	0	0
Klebsiella_pneumoniae_500_1420_strain=500_1420	0	1	0	1	0	0	0
Klebsiella_pneumoniae_blood_sample_2	0	1	0	1	0	0	0
Klebsiella_pneumoniae_CG43_strain=CG43	0	1	0	0	0	0	0
Klebsiella_pneumoniae_DMC1097_strain=DMC1097	0	1	0	1	0	0	0
Klebsiella_pneumoniae_HK787_strain=HK787	0	1	0	0	0	0	0
Klebsiella_pneumoniae_JM45	0	1	0	0	0	0	0
Klebsiella_pneumoniae_KCTC_2242_strain=KCTC_2242	0	1	0	1	0	0	0
Klebsiella_pneumoniae_KP-1_strain=KP-1	0	1	0	1	0	0	0
Klebsiella_pneumoniae_Kp_Goe_154414	0	1	0	1	0	0	0
Klebsiella_pneumoniae_strain=1756	0	1	0	1	0	0	0
Klebsiella_pneumoniae_strain=19051	0	0	0	1	0	0	0
Klebsiella_pneumoniae_strain=32192	0	1	0	1	0	0	0
Klebsiella_pneumoniae_strain=34618	0	1	0	1	0	0	0
Klebsiella_pneumoniae_strain=721005	0	1	0	1	0	0	0
Klebsiella_pneumoniae_strain=825795-1	0	1	0	1	0	0	0
Klebsiella_pneumoniae_strain=911021	0	1	0	1	0	0	0
Klebsiella_pneumoniae_strain=AATZP	0	1	0	0	0	0	0
Klebsiella_pneumoniae_strain=AR_0047	0	1	0	0	0	0	0
Klebsiella_pneumoniae_strain=AR_0049	0	1	0	0	0	0	0
Klebsiella_pneumoniae_strain=AR_0068	0	1	0	0	0	0	0
Klebsiella_pneumoniae_strain=AR_0098	0	1	0	0	0	0	0
Klebsiella_pneumoniae_strain=AR_0107	0	1	0	1	0	0	0
Klebsiella_pneumoniae_strain=AR_0112	0	1	0	1	0	0	0
Klebsiella_pneumoniae_strain=AR_0113	0	1	0	1	0	0	0
Klebsiella_pneumoniae_strain=AR_0115	0	1	0	1	0	0	0
Klebsiella_pneumoniae_strain=AR_0117	0	1	0	1	0	0	0
Klebsiella_pneumoniae_strain=AR_0120	0	1	0	1	0	0	0
Klebsiella_pneumoniae_strain=AR_0125	0	1	0	1	0	0	0
Klebsiella_pneumoniae_strain=AR_0126	0	1	0	1	0	0	0
Klebsiella_pneumoniae_strain=AR_0129	0	1	0	1	0	0	0
Klebsiella_pneumoniae_strain=AR_0138	0	1	0	1	0	0	0
Klebsiella_pneumoniae_strain=AR_0139	0	1	0	1	0	0	0
Klebsiella_pneumoniae_strain=AR_0143	0	1	0	1	0	0	0
Klebsiella_pneumoniae_strain=AR_0145	0	1	0	1	0	0	0
Klebsiella_pneumoniae_strain=AR_0146	0	1	0	1	0	0	0
Klebsiella_pneumoniae_strain=AR_0148	0	1	0	1	0	0	0
Klebsiella_pneumoniae_strain=AR_0152	0	1	0	1	0	0	0
Klebsiella_pneumoniae_strain=AR_0158	0	1	0	1	0	0	0
Klebsiella_pneumoniae_strain=ATCC_35657	0	1	0	1	0	0	0
Klebsiella_pneumoniae_strain=ATCC_BAA-2146	0	1	0	1	0	0	0
Klebsiella_pneumoniae_strain=BIC-1	0	1	0	1	0	0	0
Klebsiella_pneumoniae_strain=BK13043	0	1	0	1	0	0	0
Klebsiella_pneumoniae_strain=blaNDM-1	0	1	0	1	0	0	0
Klebsiella_pneumoniae_strain=CAV1016	0	1	0	1	0	0	0
Klebsiella_pneumoniae_strain=CAV1042	0	1	0	1	0	0	0
Klebsiella_pneumoniae_strain=CAV1193	0	1	0	1	0	0	0
Klebsiella_pneumoniae_strain=CAV1217	0	1	0	1	0	0	0
Klebsiella_pneumoniae_strain=CAV1344	0	1	0	1	0	0	0
Klebsiella_pneumoniae_strain=CAV1392	0	1	0	1	0	0	0
Klebsiella_pneumoniae_strain=CAV1417	0	1	0	1	0	0	0
Klebsiella_pneumoniae_strain=CAV1453	0	1	0	1	0	0	0
Klebsiella_pneumoniae_strain=CAV1596	0	1	0	1	0	0	0
Klebsiella_pneumoniae_strain=CN1	0	1	0	1	0	0	0
Klebsiella_pneumoniae_strain=CR14	0	1	0	1	0	0	0
Klebsiella_pneumoniae_strain=DHQP1002001	0	1	0	1	0	0	0
Klebsiella_pneumoniae_strain=ED2	0	1	0	1	0	0	0
Klebsiella_pneumoniae_strain=ED23	0	1	0	1	0	0	0
Klebsiella_pneumoniae_strain=J1	0	1	0	1	0	0	0
Klebsiella_pneumoniae_strain=K66-45	0	1	0	0	0	0	0
Klebsiella_pneumoniae_strain=KP36	0	1	0	0	0	0	0
Klebsiella_pneumoniae_strain=KP38731	0	1	0	1	0	0	0
Klebsiella_pneumoniae_strain=KP5	0	1	0	0	0	0	0
Klebsiella_pneumoniae_strain=Kp52.145	0	1	0	1	0	0	0
Klebsiella_pneumoniae_strain=KP617	0	1	0	1	0	0	0
Klebsiella_pneumoniae_strain=kp757	0	1	0	0	0	0	0
Klebsiella_pneumoniae_strain=Kp_Goe_121641	0	1	0	1	0	0	0
Klebsiella_pneumoniae_strain=Kp_Goe_149473	0	1	0	1	0	0	0
Klebsiella_pneumoniae_strain=Kp_Goe_149832	0	1	0	1	0	0	0
Klebsiella_pneumoniae_strain=Kp_Goe_152021	0	1	0	1	0	0	0
Klebsiella_pneumoniae_strain=Kp_Goe_33208	0	1	0	1	0	0	0
Klebsiella_pneumoniae_strain=Kp_Goe_39795	0	1	0	0	0	0	0
Klebsiella_pneumoniae_strain=Kp_Goe_62629	0	1	0	1	0	0	0
Klebsiella_pneumoniae_strain=Kp_Goe_71070	0	1	0	1	0	0	0
Klebsiella_pneumoniae_strain=Kp_Goe_821588	0	1	0	1	0	0	0
Klebsiella_pneumoniae_strain=Kp_Goe_822579	0	1	0	1	0	0	0
Klebsiella_pneumoniae_strain=Kp_Goe_822917	0	1	0	1	0	0	0
Klebsiella_pneumoniae_strain=Kp_Goe_827024	0	1	0	1	0	0	0
Klebsiella_pneumoniae_strain=Kp_Goe_827026	0	1	0	1	0	0	0
Klebsiella_pneumoniae_strain=KP_Goe_828304	0	1	0	1	0	0	0
Klebsiella_pneumoniae_strain=KpN01	0	1	0	1	0	0	0
Klebsiella_pneumoniae_strain=KpN06	0	1	0	0	0	0	0
Klebsiella_pneumoniae_strain=KPN1481	0	1	0	1	0	0	0
Klebsiella_pneumoniae_strain=KPN1482	0	1	0	1	0	0	0
Klebsiella_pneumoniae_strain=Kpn223	0	1	0	1	0	0	0
Klebsiella_pneumoniae_strain=KPN528	0	1	0	1	0	0	0
Klebsiella_pneumoniae_strain=Kpn555	0	1	0	0	0	0	0
Klebsiella_pneumoniae_strain=KPNIH36	0	1	0	0	0	0	0
Klebsiella_pneumoniae_strain=KPNIH39	0	1	0	0	0	0	0
Klebsiella_pneumoniae_strain=MLST-15	0	1	0	1	0	0	0
Klebsiella_pneumoniae_strain=MNCRE53	0	1	0	0	0	0	0
Klebsiella_pneumoniae_strain=MNCRE69	0	1	0	0	0	0	0
Klebsiella_pneumoniae_strain=MNCRE78	0	1	0	0	0	0	0
Klebsiella_pneumoniae_strain=MS6671	0	0	0	1	0	0	0
Klebsiella_pneumoniae_strain=NY9	0	1	0	0	0	0	0
Klebsiella_pneumoniae_strain=PMK1	0	1	0	1	0	0	0
Klebsiella_pneumoniae_strain=SKGH01	0	1	0	1	0	0	0
Klebsiella_pneumoniae_strain=SWU01	0	0	0	1	0	0	0
Klebsiella_pneumoniae_strain=TH1_TH1	0	1	0	1	0	0	0
Klebsiella_pneumoniae_strain=UCLAOXA232KP	0	1	0	1	0	0	0
Klebsiella_pneumoniae_strain=UCLAOXA232KP_Pt0	0	1	0	1	0	0	0
Klebsiella_pneumoniae_strain=W14	0	1	0	1	0	0	0
Klebsiella_pneumoniae_strain=XH209	0	1	0	1	0	0	0
Klebsiella_pneumoniae_strain=YH43	0	1	0	0	0	0	0
Klebsiella_pneumoniae_subsp._pneumoniae_1084_strain=1084	0	1	0	1	0	0	0
Klebsiella_pneumoniae_subsp._pneumoniae_1158_strain=1158	0	1	0	1	0	0	0
Klebsiella_pneumoniae_subsp._pneumoniae_HS11286_strain=HS11286	0	1	0	1	0	0	0
Klebsiella_pneumoniae_subsp._pneumoniae_Kp13_strain=Kp13	0	1	0	1	0	0	0
Klebsiella_pneumoniae_subsp._pneumoniae_KP5-1	0	1	0	1	0	0	0
Klebsiella_pneumoniae_subsp._pneumoniae_KPNIH10_strain=KPNIH10	0	1	0	1	0	0	0
Klebsiella_pneumoniae_subsp._pneumoniae_KPNIH1_strain=KPNIH1	0	1	0	1	0	0	0
Klebsiella_pneumoniae_subsp._pneumoniae_KPNIH24_strain=KPNIH24	0	1	0	1	0	0	0
Klebsiella_pneumoniae_subsp._pneumoniae_KPNIH27_strain=KPNIH27	0	1	0	1	0	0	0
Klebsiella_pneumoniae_subsp._pneumoniae_KPR0928_strain=KPR0928	0	1	0	1	0	0	0
Klebsiella_pneumoniae_subsp._pneumoniae_MGH_78578_strain=ATCC_700721;_MGH_78578	0	1	0	1	0	0	0
Klebsiella_pneumoniae_subsp._pneumoniae_NTUH-K2044_strain=NTUH-K2044	0	1	0	1	0	0	0
Klebsiella_pneumoniae_subsp._pneumoniae_PittNDM01_strain=PittNDM01	0	1	0	1	0	0	0
Klebsiella_pneumoniae_subsp._pneumoniae_strain=234-12	0	1	0	1	0	0	0
Klebsiella_pneumoniae_subsp._pneumoniae_strain=ATCC_43816_KPPR1	0	1	0	1	0	0	0
Klebsiella_pneumoniae_subsp._pneumoniae_strain=AUSMDU00008079	0	1	0	1	0	0	0
Klebsiella_pneumoniae_subsp._pneumoniae_strain=HKUOPLC	0	1	0	1	0	0	0
Klebsiella_pneumoniae_subsp._pneumoniae_strain=KPNIH29	0	1	0	1	0	0	0
Klebsiella_pneumoniae_subsp._pneumoniae_strain=KPNIH30	0	1	0	1	0	0	0
Klebsiella_pneumoniae_subsp._pneumoniae_strain=KPNIH31	0	1	0	1	0	0	0
Klebsiella_pneumoniae_subsp._pneumoniae_strain=KPNIH32	0	1	0	1	0	0	0
Klebsiella_pneumoniae_subsp._pneumoniae_strain=KPNIH33	0	1	0	1	0	0	0
Klebsiella_pneumoniae_subsp._pneumoniae_strain=NUHL24835	0	1	0	1	0	0	0
Klebsiella_pneumoniae_subsp._pneumoniae_strain=RJA166	0	1	0	1	0	0	0
Klebsiella_pneumoniae_subsp._pneumoniae_strain=RJF293	0	1	0	1	0	0	0
Klebsiella_pneumoniae_subsp._pneumoniae_strain=RJF999	0	1	0	1	0	0	0
Klebsiella_pneumoniae_subsp._pneumoniae_strain=TGH10	0	0	0	1	0	0	0
Klebsiella_pneumoniae_subsp._pneumoniae_strain=TGH13	0	1	0	1	0	0	0
Klebsiella_pneumoniae_subsp._pneumoniae_strain=TGH8	0	0	0	1	0	0	0
Klebsiella_pneumoniae_subsp._pneumoniae_WGLW3	0	1	0	1	0	0	0
Klebsiella_pneumoniae_subsp._pneumoniae_WGLW5	0	1	0	1	0	0	0
Klebsiella_pneumoniae_UHKPC07_strain=UHKPC07	0	1	0	0	0	0	0
Klebsiella_pneumoniae_UHKPC33_strain=UHKPC33	0	1	0	0	0	0	0
Klebsiella_quasipneumoniae_strain=ATCC_700603	0	1	0	1	0	0	0
Klebsiella_quasipneumoniae_strain=HKUOPA4	0	1	0	1	0	0	0
Klebsiella_quasipneumoniae_strain=HKUOPJ4	0	1	0	1	0	0	0
Klebsiella_quasipneumoniae_strain=HKUOPL4	0	1	0	1	0	0	0
Klebsiella_sp._1_1_55	0	1	0	1	0	0	0
Klebsiella_sp._4_1_44FAA	0	1	0	1	0	0	0
Klebsiella_sp._KPN1705_strain=KPN1705	0	1	0	0	0	0	0
Klebsiella_sp._LTGPAF-6F_strain=LTGPAF-6F	0	0	0	0	0	1	0
Klebsiella_sp._MS_92-3	0	1	0	1	0	0	0
Klebsiella_variicola_At-22_strain=At-22	0	1	0	0	0	0	0
Klebsiella_variicola_strain=DSM_15968	0	1	0	0	0	0	0
Klebsiella_variicola_strain=DX120E	0	1	0	0	0	0	0
Klebsiella_variicola_strain=GJ1	0	1	0	0	0	0	0
Klebsiella_variicola_strain=GJ2	0	1	0	0	0	0	0
Klebsiella_variicola_strain=GJ3	0	1	0	0	0	0	0
Klebsiella_variicola_strain=HKUOPLA	0	1	0	0	0	0	0
Kribbella_flavida_DSM_17836_strain=DSM_17836	1	1	0	0	0	0	0
Kutzneria_albida_DSM_43870_strain=DSM_43870	1	0	0	0	0	1	0
Labilithrix_luteola_strain=DSM_27648	1	0	0	0	0	0	0
Labrenzia_aggregata_strain=RMAR6-6	1	1	0	0	0	0	0
Labrenzia_sp._CP4_strain=CP4	1	1	0	0	0	0	0
Labrenzia_sp._VG12_strain=VG12	1	1	0	0	0	0	0
Lachnospiraceae_bacterium_2_1_46FAA	0	0	0	0	0	0	1
Lachnospiraceae_bacterium_2_1_58FAA	0	0	0	0	0	0	1
Lachnospiraceae_bacterium_6_1_37FAA	0	0	0	0	0	0	1
Lachnospiraceae_bacterium_6_1_63FAA	0	0	0	0	0	0	1
Lachnospiraceae_bacterium_7_1_58FAA	0	0	0	0	0	1	0
Lachnospiraceae_bacterium_9_1_43BFAA	0	0	0	0	0	0	1
Lacimicrobium_alkaliphilum_strain=YelD216	0	1	0	0	0	0	0
Lacinutrix_sp._5H-3-7-4_strain=5H-3-7-4	1	1	0	0	0	0	0
Lacinutrix_venerupis_strain=DOK2-8	1	1	0	0	0	0	0
Lactobacillus_brevis_subsp._gravesensis_ATCC_27305	0	0	1	0	0	0	0
Lactobacillus_buchneri_ATCC_11577	0	0	1	0	0	0	0
Lactobacillus_hilgardii_ATCC_8290	0	0	1	0	0	0	0
Lactobacillus_plantarum_subsp._plantarum_ATCC_14917_=_JCM_1149_=	0	0	1	0	0	0	0
Lactococcus_lactis_strain=AI06	0	0	0	1	0	0	0
Lactococcus_lactis_subsp._cremoris_A76_strain=A76	0	0	0	1	0	0	0
Lactococcus_lactis_subsp._cremoris_KW2_strain=KW2	0	0	0	1	0	0	0
Lactococcus_lactis_subsp._cremoris_MG1363_strain=MG1363	0	0	0	1	0	0	0
Lactococcus_lactis_subsp._cremoris_NZ9000_strain=NZ9000	0	0	0	1	0	0	0
Lactococcus_lactis_subsp._cremoris_SK11_strain=SK11	0	0	0	1	0	0	0
Lactococcus_lactis_subsp._cremoris_strain=158	0	0	0	1	0	0	0
Lactococcus_lactis_subsp._cremoris_strain=JM1	0	0	0	1	0	0	0
Lactococcus_lactis_subsp._cremoris_strain=JM2	0	0	0	1	0	0	0
Lactococcus_lactis_subsp._cremoris_strain=JM3	0	0	0	1	0	0	0
Lactococcus_lactis_subsp._cremoris_strain=JM4	0	0	0	1	0	0	0
Lactococcus_lactis_subsp._cremoris_strain=UC109	0	0	0	1	0	0	0
Lactococcus_lactis_subsp._cremoris_UC509.9_strain=UC509.9	0	0	0	1	0	0	0
Lactococcus_lactis_subsp._lactis	0	0	0	1	0	0	0
Lactococcus_lactis_subsp._lactis_bv._diacetylactis_strain=FM03	0	0	0	1	0	0	0
Lactococcus_lactis_subsp._lactis_CV56_strain=CV56	0	0	0	1	0	0	0
Lactococcus_lactis_subsp._lactis_Il1403_strain=IL1403	0	0	0	1	0	0	0
Lactococcus_lactis_subsp._lactis_IO-1_strain=IO-1	0	0	0	1	0	0	0
Lactococcus_lactis_subsp._lactis_KF147_strain=KF147	0	0	0	1	0	0	0
Lactococcus_lactis_subsp._lactis_KLDS_4.0325_strain=KLDS_4.0325	0	0	0	1	0	0	0
Lactococcus_lactis_subsp._lactis_NCDO_2118_strain=NCDO_2118	0	0	0	1	0	0	0
Lactococcus_lactis_subsp._lactis_strain=184	0	0	0	1	0	0	0
Lactococcus_lactis_subsp._lactis_strain=229	0	0	0	1	0	0	0
Lactococcus_lactis_subsp._lactis_strain=275	0	0	0	1	0	0	0
Lactococcus_lactis_subsp._lactis_strain=A12	0	0	0	1	0	0	0
Lactococcus_lactis_subsp._lactis_strain=C10	0	0	0	1	0	0	0
Lactococcus_lactis_subsp._lactis_strain=S0	0	0	0	1	0	0	0
Lactococcus_lactis_subsp._lactis_strain=UC06	0	0	0	1	0	0	0
Lactococcus_lactis_subsp._lactis_strain=UC063	0	0	0	1	0	0	0
Lactococcus_lactis_subsp._lactis_strain=UC08	0	0	0	1	0	0	0
Lactococcus_lactis_subsp._lactis_strain=UC11	0	0	0	1	0	0	0
Lactococcus_lactis_subsp._lactis_strain=UC77	0	0	0	1	0	0	0
Lactococcus_lactis_subsp._lactis_strain=UL8	0	0	0	1	0	0	0
Leadbetterella_byssophila_DSM_17132_strain=DSM_17132	0	0	0	0	0	1	0
Legionella_fallonii_LLAP-10_strain=LLAP-10	0	1	0	0	0	0	0
Legionella_oakridgensis_ATCC_33761_=_DSM_21215_strain=ATCC_33761_=_DSM_21215;_OR-10	0	0	0	1	0	0	0
Leifsonia_xyli_strain=SE134	1	0	0	0	0	0	0
Lentibacillus_amyloliquefaciens_strain=LAM0015	1	0	0	0	0	0	0
Lentzea_guizhouensis_strain=DHS_C013	1	1	0	0	0	0	0
Leptolyngbya_sp._PCC_7376	0	1	0	0	0	0	0
Liberibacter_crescens_BT-1_strain=BT-1	0	0	1	0	0	0	0
Limnohabitans_sp._103DPR2_strain=103DPR2	1	0	0	0	0	0	0
Limnohabitans_sp._63ED37-2_strain=63ED37-2	1	0	0	0	0	0	0
Listeria_grayi_DSM_20601	0	0	0	1	0	0	0
Luteibacter_rhizovicinus_DSM_16549_strain=LJ96T	1	1	0	0	0	0	0
Luteipulveratus_mongoliensis_strain=MN07-A0370	1	0	0	0	0	0	0
Lutibacter_sp._LPB0138_strain=LPB0138	1	1	0	0	0	0	0
Lysinibacillus_fusiformis_strain=RB-21	0	1	0	0	0	0	0
Lysinibacillus_sphaericus_strain=LMG_22257	1	0	0	0	0	0	0
Lysobacter_antibioticus_strain=76	1	1	0	0	0	0	0
Lysobacter_antibioticus_strain=ATCC_29479	1	1	0	0	0	0	0
Lysobacter_capsici_strain=55	1	1	0	0	0	0	0
Lysobacter_gummosus_strain=3.2.11	1	1	0	0	0	0	0
Macrococcus_canis_strain=KM45013	1	0	0	0	0	0	0
Mannheimia_sp._USDA-ARS-USMARC-1261_strain=USDA-ARS-USMARC-1261	0	0	0	0	0	1	0
Maribacter_sp._1_2014MBL_MicDiv_strain=1_2014MBL_MicDiv	1	1	0	0	0	0	0
Maribacter_sp._B1_strain=B1	1	1	0	0	0	0	0
Maribacter_sp._HTCC2170_strain=HTCC2170	1	1	0	0	0	0	0
Maribacter_sp._T28_strain=T28	1	1	0	0	0	0	0
Maricaulis_maris_MCS10_strain=MCS10	1	0	0	0	0	0	1
Marinithermus_hydrothermalis_DSM_14884_strain=DSM_14884	0	0	0	0	0	1	1
Marinobacterium_aestuarii_strain=ST58-10	1	0	0	0	0	0	0
Marinovum_algicola_DG_898_strain=DG_898	1	0	0	0	0	0	0
Marivirga_tractuosa_DSM_4126_strain=DSM_4126	1	1	0	0	0	0	0
Marivivens_sp._JLT3646_strain=JLT3646	0	1	0	0	0	0	0
Massilia_sp._NR_4-1_strain=NR_4-1	1	0	0	0	0	0	0
Massilia_sp._WG5_strain=WG5	1	0	0	0	0	0	0
Meiothermus_ruber_DSM_1279	1	0	0	0	0	0	0
Meiothermus_silvanus_DSM_9946_strain=DSM_9946	1	0	0	0	0	0	0
Mesorhizobium_amorphae_CCNWGS0123_strain=CCNWGS0123	1	1	0	0	0	0	0
Mesorhizobium_australicum_WSM2073_strain=WSM2073	1	1	0	0	0	0	0
Mesorhizobium_ciceri_biovar_biserrulae_strain=WSM1284	1	1	0	0	0	0	0
Mesorhizobium_ciceri_biovar_biserrulae_WSM1271_strain=WSM1271	1	1	0	0	0	0	0
Mesorhizobium_ciceri_strain=CC1192	1	1	0	0	0	0	0
Mesorhizobium_loti_MAFF303099_strain=MAFF303099	1	1	0	0	0	0	0
Mesorhizobium_loti_NZP2037_strain=NZP2037	1	1	0	0	0	0	0
Mesorhizobium_opportunistum_WSM2075_strain=WSM2075	1	0	0	0	0	0	0
Mesorhizobium_sp._B7_strain=B7	1	0	0	0	0	0	0
Mesorhizobium_sp._WSM1497_strain=WSM1497	1	1	0	0	0	0	0
Methylobacterium_nodulans_ORS_2060_strain=ORS_2060	0	0	0	0	0	0	1
Methylobacterium_sp._4-46_strain=4-46	0	0	0	0	0	0	1
Methylocella_silvestris_BL2_strain=BL2	0	1	0	0	0	0	0
Methylocystis_sp._SC2_strain=SC2	0	0	0	0	0	1	0
Microbacterium_chocolatum_strain=SIT_101	1	0	0	0	0	0	0
Microbacterium_sp._1.5R_strain=1.5R	1	0	0	0	0	0	0
Microbacterium_sp._PAMC_28756_strain=HSR44	1	0	0	0	0	0	0
Microbulbifer_agarilyticus_strain=GP101	1	0	0	0	0	0	0
Microlunatus_phosphovorus_NM-1_strain=NM-1	1	0	0	0	0	0	0
Micromonospora_aurantiaca_ATCC_27029_strain=ATCC_27029	1	1	0	0	0	0	0
Micromonospora_sp._L5_strain=L5	1	1	0	0	0	0	0
Microterricola_viridarii_strain=ERGS5:02	1	1	0	0	0	0	0
Minicystis_rosea_strain=DSM_24000	1	0	0	0	0	0	0
Mitsuaria_sp._7_strain=7	1	0	0	0	0	0	0
Modestobacter_marinus_strain=BC501	1	0	0	0	0	0	0
Morganella_morganii_strain=FDAARGOS_172	0	0	0	0	0	1	0
Morganella_morganii_subsp._morganii_KT_KT	0	0	0	0	0	1	0
Moritella_viscosa	0	1	0	0	0	0	0
Mucilaginibacter_sp._BJC16-A31_strain=BJC16-A31	1	0	0	0	0	0	0
Muricauda_lutaonensis_strain=CC-HSB-11	1	1	0	0	0	0	0
Muricauda_ruestringensis_DSM_13258_strain=DSM_13258	1	1	0	0	0	0	1
Mycobacterium_goodii_strain=X7B	0	1	0	0	0	0	0
Mycobacterium_sp._JS623_strain=JS623	0	1	0	0	0	0	0
Mycoplasma_bovis_strain=NM_2012_pathogen_isolation	_culture_and_biochemical_identification_method	0	0	0	0	0	0
Myroides_odoratimimus_strain=PR63039	1	1	0	0	0	0	0
Myroides_profundi_strain=D25	1	1	0	0	0	0	0
Myroides_sp._A21_strain=A21	1	1	0	0	0	0	0
Myroides_sp._ZB35_strain=ZB35	1	1	0	0	0	0	0
Myxococcus_fulvus_124B02_strain=124B02	1	1	0	0	0	0	0
Myxococcus_fulvus_HW-1_strain=HW-1	0	1	0	0	0	0	0
Myxococcus_hansupus_strain=mixupus	0	1	0	0	0	0	0
Myxococcus_stipitatus_DSM_14675_strain=DSM_14675	1	1	0	0	0	0	0
Myxococcus_xanthus_DK_1622_strain=DK_1622	0	1	0	0	0	0	0
Nakamurella_multipartita_DSM_44233_strain=DSM_44233	1	0	0	0	0	0	0
Neisseria_gonorrhoeae_FA_1090_strain=FA_1090	0	1	0	0	0	0	0
Neisseria_gonorrhoeae_strain=FDAARGOS_204	0	1	0	0	0	0	0
Neisseria_macacae_ATCC_33926	0	1	0	0	0	0	0
Neorhizobium_galegae_bv._officinalis_bv._officinalis_str._HAMBI_1141_strain=HAMBI_1141	1	0	0	0	0	0	0
Neorhizobium_galegae_bv._orientalis_str._HAMBI_540_strain=HAMBI_540	1	0	0	0	0	0	0
Niabella_soli_DSM_19437_strain=JS13-8;_DSM_19437	0	0	0	0	0	1	0
Niastella_koreensis_GR20-10_strain=GR20-10	0	0	0	0	0	0	1
Nitrobacter_winogradskyi_Nb-255_strain=Nb-255	0	0	0	0	0	0	1
Nitrosococcus_halophilus_Nc_4_strain=Nc_4	1	0	0	0	0	0	0
Nitrosococcus_oceani_ATCC_19707_strain=ATCC_19707	0	0	0	0	0	0	1
Nitrospirillum_amazonense_CBAmc_strain=CBAmC	1	0	0	0	0	0	0
Nocardia_brasiliensis_ATCC_700358_strain=HUJEG-1	1	0	0	0	0	0	0
Nocardia_brasiliensis_strain=FDAARGOS_352	1	0	0	0	0	0	0
Nocardia_nova_SH22a_strain=SH22a	0	1	0	0	0	0	0
Nocardioides_dokdonensis_FR1436_strain=FR1436	1	0	0	0	0	0	0
Nocardioides_sp._JS614_strain=JS614	1	0	0	0	0	1	0
Nocardiopsis_alba_ATCC_BAA-2165_strain=ATCC_BAA-2165	1	0	0	0	0	0	0
Nocardiopsis_dassonvillei_strain=HZNU_N_1	1	0	0	0	0	0	0
Nocardiopsis_dassonvillei_strain=NOCA502F	1	0	0	0	0	0	0
Nocardiopsis_dassonvillei_subsp._dassonvillei_DSM_43111_strain=DSM_43111	1	0	0	0	0	0	0
Nocardiopsis_gilva_YIM_90087_strain=YIM_90087	1	0	0	0	0	0	0
Nonlabens_dokdonensis_DSW-6_strain=DSW-6	1	1	0	0	0	0	0
Nonlabens_sediminis_strain=NBRC_100970	1	1	0	0	0	0	0
Nonlabens_sp._MIC269_strain=MIC269	1	1	0	0	0	0	0
Nonomuraea_sp._ATCC_55076_strain=ATCC_55076	1	1	0	0	0	0	0
Nostocales_cyanobacterium_HT-58-2_strain=HT-58-2	1	0	0	0	0	0	0
Novosphingobium_pentaromativorans_US6-1_strain=US6-1	1	0	0	0	0	0	0
Novosphingobium_sp._PP1Y_strain=PP1Y	1	0	0	0	0	0	0
Oceanithermus_profundus_DSM_14977_strain=DSM_14977	0	0	0	0	0	1	0
Oceanobacillus_iheyensis_HTE831_strain=HTE831	1	0	0	0	0	0	0
Ochrobactrum_anthropi_ATCC_49188_strain=ATCC_49188	0	1	0	0	0	0	0
Ochrobactrum_anthropi_strain=OAB	0	1	0	0	0	0	0
Ochrobactrum_pseudogrignonense_strain=K8	0	1	0	0	0	0	0
Octadecabacter_arcticus_238_strain=238	0	1	0	0	0	0	0
Odoribacter_laneus_YIT_12061	0	0	0	0	0	1	0
Odoribacter_splanchnicus_DSM_20712_strain=DSM_220712	0	0	0	0	0	1	0
Odoribacter_splanchnicus_strain=NCTC10825	0	0	0	0	0	1	0
Oenococcus_oeni_PSU-1_strain=PSU-1	0	1	0	0	0	0	0
Opitutus_terrae_PB90-1_strain=PB90-1	0	0	0	0	0	1	0
Owenweeksia_hongkongensis_DSM_17368_strain=DSM_17368	1	1	0	0	0	0	0
[truncated: 1,392 more rows]
