# Supplementary material for: Tryptophan Metabolism by Gut Microbiome and Gut-Brain-Axis: An in silico Analysis
Source: Front Neurosci. 2019 Dec 18;13:1365. doi: 10.3389/fnins.2019.01365 (PMC6930238; doi:10.3389/fnins.2019.01365)
Supplement: Supplementary file 4 [file Table_4.xlsx]

## Sheet: Sheet1
Supplementary Table S4: Binary profile of six tryptophan metabolism pathways across completely sequenced gut bacterial genomes (obtained from HMP database). ‘1’ and ‘0’ indicate presence and absence of the six pathways respectively. IAA production_1 and IAA production_2 represent the pathways involving tryptophan 2-monooxgenase and indolepyruvate decarboxylase respectively.
Bacterial Strains	Tryptophan metabolism pathways
	Kynurenine production	Quinolinate production	IAA production_1	IAA production_2	IPA production	Indole production	Tryptamine production
Acinetobacter_radioresistens_SH164	0	0	0	1	0	0	0
Alistipes_indistinctus_YIT_12060	0	0	0	0	0	1	0
Alistipes_putredinis_DSM_17216	0	0	0	0	0	1	0
Alistipes_shahii_WAL_8301	0	0	0	0	0	1	0
Anaerococcus_hydrogenalis_DSM_7454	0	0	0	0	0	1	0
Anaerotruncus_colihominis_DSM_17241	0	0	0	0	0	1	0
Bacillus_sp._7_6_55CFAA_CT2	1	0	1	1	0	0	0
Bacteroides_cellulosilyticus_DSM_14838	0	0	0	0	0	1	0
Bacteroides_clarus_YIT_12056	0	0	0	0	0	1	0
Bacteroides_eggerthii_1_2_48FAA	0	0	0	0	0	1	0
Bacteroides_eggerthii_DSM_20697	0	0	0	0	0	1	0
Bacteroides_fluxus_YIT_12057	0	0	0	0	0	1	0
Bacteroides_intestinalis_DSM_17393	0	0	0	0	0	1	0
Bacteroides_oleiciplenus_YIT_12058	0	0	0	0	0	1	0
Bacteroides_ovatus_3_8_47FAA	0	0	0	0	0	1	0
Bacteroides_ovatus_ATCC_8483	0	0	0	0	0	1	0
Bacteroides_ovatus_SD_CMC_3f	0	0	0	0	0	1	0
Bacteroides_salyersiae_WAL_10018_=_DSM_18765_=_JCM_12988	0	0	0	0	0	1	0
Bacteroides_sp._1_1_14	0	0	0	0	0	1	0
Bacteroides_sp._1_1_30	0	0	0	0	0	1	0
Bacteroides_sp._1_1_6	0	0	0	0	0	1	0
Bacteroides_sp._2_1_16	0	0	0	0	0	1	0
Bacteroides_sp._2_1_22	0	0	0	0	0	1	0
Bacteroides_sp._2_1_33B	0	0	0	0	0	1	0
Bacteroides_sp._2_1_56FAA	0	0	0	0	0	1	0
Bacteroides_sp._2_2_4	0	0	0	0	0	1	0
Bacteroides_sp._3_1_19	0	0	0	0	0	1	0
Bacteroides_sp._3_1_23	0	0	0	0	0	1	0
Bacteroides_sp._3_1_33FAA	0	0	0	0	0	1	0
Bacteroides_sp._3_1_40A	0	0	0	0	0	1	0
Bacteroides_sp._3_2_5	0	0	0	0	0	1	0
Bacteroides_sp._4_1_36	0	0	0	0	0	1	0
Bacteroides_sp._4_3_47FAA	0	0	0	0	0	1	0
Bacteroides_sp._9_1_42FAA	0	0	0	0	0	1	0
Bacteroides_sp._D1	0	0	0	0	0	1	0
Bacteroides_sp._D2	0	0	0	0	0	1	0
Bacteroides_sp._D20	0	0	0	0	0	1	0
Bacteroides_sp._D22	0	0	0	0	0	1	0
Bacteroides_sp._HPS0048	0	0	0	0	0	1	0
Bacteroides_stercoris_ATCC_43183	0	0	0	0	0	1	0
Bacteroides_uniformis_ATCC_8492	0	0	0	0	0	1	0
Bacteroides_xylanisolvens_SD_CC_1b	0	0	0	0	0	1	0
Bacteroides_xylanisolvens_SD_CC_2a	0	0	0	0	0	1	0
Bacteroides_xylanisolvens_XB1A	0	0	0	0	0	1	0
Bifidobacterium_catenulatum_DSM_16992_=_JCM_1194_=_LMG_11043	0	0	0	0	0	0	1
Blautia_hansenii_DSM_20583	0	0	0	0	0	0	1
Cedecea_davisae_DSM_4568	0	0	0	1	0	0	0
Citrobacter_freundii_4_7_47CFAA	0	0	0	1	0	1	0
Citrobacter_sp._30_2	0	0	0	1	0	1	0
Citrobacter_youngae_ATCC_29220	0	0	0	1	0	1	0
Clostridiales_bacterium_1_7_47FAA	0	0	0	0	0	1	0
Clostridium_sporogenes_ATCC_15579	0	0	1	0	1	0	1
Collinsella_tanakaei_YIT_12063	0	0	0	0	0	0	1
Coprobacillus_sp._29_1	0	1	0	0	0	0	0
Coprococcus_sp._HPP0048	0	0	0	0	0	0	1
Coprococcus_sp._HPP0074	0	0	0	0	0	0	1
Corynebacterium_ammoniagenes_DSM_20306	0	0	1	1	0	0	0
Desulfitobacterium_hafniense_DP7	0	0	1	0	0	1	0
Dysgonomonas_gadei_ATCC_BAA-286	0	0	0	0	0	1	0
Dysgonomonas_mossii_DSM_22836	0	0	0	0	0	1	0
Edwardsiella_tarda_ATCC_23685	0	0	0	1	0	1	0
Enterobacter_cancerogenus_ATCC_35316	0	0	0	1	0	0	0
Enterobacter_cloacae_subsp._cloacae_NCTC_9394	0	0	0	1	0	0	0
Enterobacteriaceae_bacterium_9_2_54FAA	0	0	0	1	0	0	0
Escherichia_coli_4_1_47FAA	0	0	0	0	0	1	0
Escherichia_coli_D9	0	0	0	0	0	1	0
Escherichia_coli_MS_107-1	0	0	0	0	0	1	0
Escherichia_coli_MS_110-3	0	0	0	0	0	1	0
Escherichia_coli_MS_115-1	0	0	0	0	0	1	0
Escherichia_coli_MS_116-1	0	0	0	0	0	1	0
Escherichia_coli_MS_117-3	0	0	0	0	0	1	0
Escherichia_coli_MS_119-7	0	0	0	0	0	1	0
Escherichia_coli_MS_124-1	0	0	0	0	0	1	0
Escherichia_coli_MS_145-7	0	0	0	0	0	1	0
Escherichia_coli_MS_146-1	0	0	0	0	0	1	0
Escherichia_coli_MS_153-1	0	0	0	0	0	1	0
Escherichia_coli_MS_16-3	0	0	0	0	0	1	0
Escherichia_coli_MS_175-1	0	0	0	0	0	1	0
Escherichia_coli_MS_182-1	0	0	0	0	0	1	0
Escherichia_coli_MS_185-1	0	0	0	0	0	1	0
Escherichia_coli_MS_187-1	0	0	0	0	0	1	0
Escherichia_coli_MS_196-1	0	0	0	0	0	1	0
Escherichia_coli_MS_198-1	0	0	0	0	0	1	0
Escherichia_coli_MS_200-1	0	0	0	0	0	1	0
Escherichia_coli_MS_21-1	0	0	0	0	0	1	0
Escherichia_coli_MS_45-1	0	0	0	0	0	1	0
Escherichia_coli_MS_57-2	0	0	0	0	0	1	0
Escherichia_coli_MS_60-1	0	0	0	0	0	1	0
Escherichia_coli_MS_69-1	0	0	0	0	0	1	0
Escherichia_coli_MS_78-1	0	0	0	0	0	1	0
Escherichia_coli_MS_79-10	0	0	0	0	0	1	0
Escherichia_coli_MS_84-1	0	0	0	0	0	1	0
Escherichia_coli_MS_85-1	0	0	0	0	0	1	0
Escherichia_coli_SE11	0	0	0	0	0	1	0
Escherichia_coli_SE15	0	0	0	0	0	1	0
Escherichia_sp._1_1_43	0	0	0	0	0	1	0
Escherichia_sp._3_2_53FAA	0	0	0	0	0	1	0
Escherichia_sp._4_1_40B	0	0	0	0	0	1	0
Fusobacterium_gonidiaformans_3-1-5R	0	0	0	0	0	1	0
Fusobacterium_gonidiaformans_ATCC_25563	0	0	0	0	0	1	0
Fusobacterium_necrophorum_D12	0	0	0	0	0	1	0
Fusobacterium_necrophorum_subsp._funduliforme_1_1_36S	0	0	0	0	0	1	0
Fusobacterium_nucleatum_subsp._animalis_11_3_2	0	0	0	0	0	1	0
Fusobacterium_nucleatum_subsp._animalis_21_1A	0	0	0	0	0	1	0
Fusobacterium_nucleatum_subsp._animalis_3_1_33	0	0	0	0	0	1	0
Fusobacterium_nucleatum_subsp._animalis_7_1	0	0	0	0	0	1	0
Fusobacterium_nucleatum_subsp._animalis_ATCC_51191	0	0	1	0	0	1	0
Fusobacterium_nucleatum_subsp._animalis_D11	0	0	0	0	0	1	0
Fusobacterium_nucleatum_subsp._vincentii_4_1_13	0	0	0	0	0	1	0
Fusobacterium_periodonticum_1_1_41FAA	0	0	0	0	0	1	0
Fusobacterium_periodonticum_2_1_31	0	0	0	0	0	1	0
Fusobacterium_ulcerans_12-1B	0	0	0	0	0	1	0
Fusobacterium_ulcerans_ATCC_49185	0	0	0	0	0	1	0
Fusobacterium_varium_ATCC_27725	0	0	0	0	0	1	0
Hafnia_alvei_ATCC_51873	0	0	0	1	0	0	0
Holdemania_filiformis_DSM_12042	0	0	0	0	0	0	1
Intestinibacter_bartlettii_DSM_16795	0	0	1	0	0	0	0
Klebsiella_pneumoniae_subsp._pneumoniae_WGLW3	0	1	0	1	0	0	0
Klebsiella_pneumoniae_subsp._pneumoniae_WGLW5	0	1	0	1	0	0	0
Klebsiella_sp._1_1_55	0	1	0	1	0	0	0
Klebsiella_sp._4_1_44FAA	0	1	0	1	0	0	0
Klebsiella_sp._MS_92-3	0	1	0	1	0	0	0
Lachnospiraceae_bacterium_2_1_46FAA	0	0	0	0	0	0	1
Lachnospiraceae_bacterium_2_1_58FAA	0	0	0	0	0	0	1
Lachnospiraceae_bacterium_6_1_37FAA	0	0	0	0	0	0	1
Lachnospiraceae_bacterium_6_1_63FAA	0	0	0	0	0	0	1
Lachnospiraceae_bacterium_7_1_58FAA	0	0	0	0	0	1	0
Lachnospiraceae_bacterium_9_1_43BFAA	0	0	0	0	0	0	1
Lactobacillus_brevis_subsp._gravesensis_ATCC_27305	0	0	1	0	0	0	0
Lactobacillus_buchneri_ATCC_11577	0	0	1	0	0	0	0
Lactobacillus_hilgardii_ATCC_8290	0	0	1	0	0	0	0
Lactobacillus_plantarum_subsp._plantarum_ATCC_14917_=_JCM_1149_=	0	0	1	0	0	0	0
Listeria_grayi_DSM_20601	0	0	0	1	0	0	0
Neisseria_macacae_ATCC_33926	0	1	0	0	0	0	0
Odoribacter_laneus_YIT_12061	0	0	0	0	0	1	0
Oxalobacter_formigenes_HOxBLS	0	0	0	0	0	1	0
Oxalobacter_formigenes_OXCC13	0	0	0	0	0	1	0
Paenisporosarcina_sp._HGH0030	1	0	0	0	0	0	0
Propionibacterium_sp._5_U_42AFAA	0	0	0	0	0	1	0
Proteus_mirabilis_WGLW6	0	0	0	1	1	0	0
Proteus_penneri_ATCC_35198	0	0	0	1	1	0	0
Providencia_alcalifaciens_DSM_30120	0	0	0	1	0	1	0
Providencia_rettgeri_DSM_1131	0	0	0	1	0	1	0
Providencia_rustigianii_DSM_4541	1	0	0	1	0	1	0
Providencia_stuartii_ATCC_25827	0	0	0	1	0	1	0
Pseudomonas_sp._2_1_26	1	0	0	0	0	0	0
Ralstonia_sp._5_2_56FAA	1	0	0	0	0	0	0
Ralstonia_sp._5_7_47FAA	1	0	0	0	0	0	0
Ruminococcus_gnavus_ATCC_29149	0	0	0	0	0	0	1
Staphylococcus_sp._HGB0015	0	0	0	1	0	0	0
Streptococcus_equinus_ATCC_9812	0	0	0	1	0	0	0
Streptomyces_sp._HGB0020	1	0	1	0	0	0	0
Streptomyces_sp._HPH0547	1	1	1	0	0	0	0
Tannerella_sp._6_1_58FAA_CT1	0	0	0	0	0	1	0
Tyzzerella_nexilis_DSM_1787	0	0	0	0	0	0	1
Yokenella_regensburgei_ATCC_43003	0	0	0	1	0	0	0
