# Supplementary material for: Tryptophan Metabolism by Gut Microbiome and Gut-Brain-Axis: An in silico Analysis
Source: Front Neurosci. 2019 Dec 18;13:1365. doi: 10.3389/fnins.2019.01365 (PMC6930238; doi:10.3389/fnins.2019.01365)
Supplement: Supplementary file 5 [file Table_5.xlsx]

## Sheet: Sheet1
Supplementary Table S5: Distribution of tryptophan transporters in gut bacteria
Gut Bacterial Strains	Tryptophan transporters
	AroP	Mtr	TnaB
Citrobacter_freundii_4_7_47CFAA	1	1	1
Citrobacter_sp._30_2	1	1	1
Citrobacter_youngae_ATCC_29220	0	1	1
Desulfitobacterium_hafniense_DP7	1	0	0
Edwardsiella_tarda_ATCC_23685	0	1	1
Escherichia_coli_4_1_47FAA	0	1	1
Escherichia_coli_D9	0	1	1
Escherichia_coli_MS_107-1	0	1	1
Escherichia_coli_MS_110-3	0	1	1
Escherichia_coli_MS_115-1	0	1	1
Escherichia_coli_MS_116-1	0	1	1
Escherichia_coli_MS_117-3	0	1	1
Escherichia_coli_MS_119-7	0	1	1
Escherichia_coli_MS_124-1	0	1	1
Escherichia_coli_MS_145-7	0	1	1
Escherichia_coli_MS_146-1	0	1	1
Escherichia_coli_MS_153-1	0	1	1
Escherichia_coli_MS_16-3	0	1	1
Escherichia_coli_MS_175-1	0	1	1
Escherichia_coli_MS_182-1	0	1	1
Escherichia_coli_MS_185-1	0	1	1
Escherichia_coli_MS_187-1	0	1	1
Escherichia_coli_MS_196-1	0	1	1
Escherichia_coli_MS_198-1	0	1	1
Escherichia_coli_MS_200-1	0	1	1
Escherichia_coli_MS_21-1	0	1	1
Escherichia_coli_MS_45-1	0	1	1
Escherichia_coli_MS_57-2	0	1	1
Escherichia_coli_MS_60-1	0	1	1
Escherichia_coli_MS_69-1	0	1	1
Escherichia_coli_MS_78-1	0	1	1
Escherichia_coli_MS_79-10	0	1	1
Escherichia_coli_MS_84-1	0	1	1
Escherichia_coli_MS_85-1	0	1	1
Escherichia_sp._1_1_43	0	1	1
Escherichia_sp._3_2_53FAA	0	1	1
Escherichia_sp._4_1_40B	0	1	1
Providencia_alcalifaciens_DSM_30120	0	1	0
Providencia_rettgeri_DSM_1131	0	1	0
Providencia_rustigianii_DSM_4541	0	1	0
Providencia_stuartii_ATCC_25827	0	1	1
