# Supplementary material for: Tryptophan Metabolism by Gut Microbiome and Gut-Brain-Axis: An in silico Analysis
Source: PubMed Central journal article supplement (PMC6930238; doi:10.3389/fnins.2019.01365), 2019-12-18
Supplement: Table_2.pdf [file Table_2.pdf]

**Supplementary Table S2:** Details of the 16S rRNA gut microbiome datasets analyzed in the present study

| Study         | No. of samples |     | Site            | Geography | Reference                  |
|---------------|----------------|-----|-----------------|-----------|----------------------------|
| Autism        | Control        | 19  | Duodenal Biopsy | US        | (Kushak et al., 2017)      |
|               | Disease        | 21  |                 |           |                            |
|               | Control        | 40  | Stool           | Italy     | (Strati et al., 2017)      |
|               | Disease        | 40  |                 |           |                            |
|               | Control        | 24  | Stool           | India     | (Pulikkan et al., 2018)    |
|               | Disease        | 30  |                 |           |                            |
| Parkinson     | Control        | 72  | Stool           | Finland   | (Scheperjans et al., 2015) |
|               | Disease        | 72  |                 |           |                            |
|               | Control        | 130 | Stool           | US        | (Hill-Burns et al., 2017)  |
|               | Disease        | 197 |                 |           |                            |
| Schizophrenia | Control        | 53  | Stool           | China     | (Shen et al., 2018)        |
|               | Disease        | 64  |                 |           |                            |

## References

- Hill-Burns, E. M., Debelius, J. W., Morton, J. T., Wissemann, W. T., Lewis, M. R., Wallen, Z. D., et al. (2017). Parkinson's Disease and PD Medications Have Distinct Signatures of the Gut Microbiome. *Mov. Disord. Off. J. Mov. Disord. Soc.* 32, 739–749. doi:10.1002/mds.26942.
- Kushak, R. I., Winter, H. S., Buie, T. M., Cox, S. B., Phillips, C. D., and Ward, N. L. (2017). Analysis of the Duodenal Microbiome in Autistic Individuals: Association With Carbohydrate Digestion. *J. Pediatr. Gastroenterol. Nutr.* 64, e110–e116. doi:10.1097/MPG.0000000000001458.
- Pulikkan, J., Maji, A., Dhakan, D. B., Saxena, R., Mohan, B., Anto, M. M., et al. (2018). Gut Microbial Dysbiosis in Indian Children with Autism Spectrum Disorders. *Microb. Ecol.* 76, 1102–1114. doi:10.1007/s00248-018-1176-2.
- Scheperjans, F., Aho, V., Pereira, P. A. B., Koskinen, K., Paulin, L., Pekkonen, E., et al. (2015). Gut microbiota are related to Parkinson's disease and clinical phenotype. *Mov. Disord. Off. J. Mov. Disord. Soc.* 30, 350–358. doi:10.1002/mds.26069.
- Shen, Y., Xu, J., Li, Z., Huang, Y., Yuan, Y., Wang, J., et al. (2018). Analysis of gut microbiota diversity and auxiliary diagnosis as a biomarker in patients with schizophrenia: A cross-sectional study. *Schizophr. Res.* doi:10.1016/j.schres.2018.01.002.
- Strati, F., Cavalieri, D., Albanese, D., De Felice, C., Donati, C., Hayek, J., et al. (2017). New evidences on the altered gut microbiota in autism spectrum disorders. *Microbiome* 5, 24. doi:10.1186/s40168-017-0242-1.
